# Supplementary material for: Modeling the effects of tropospheric ozone on the growth and yield of global staple crops with DSSAT v4.8.0
Source: Copernicus journal article supplement (doi:10.5194/gmd-17-2547-2024), 2024-04-05
Supplement: Supplementary file 1 [file gmd-17-2547-2024-supplement.pdf]

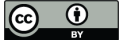

*Supplement of*

## **Modeling the effects of tropospheric ozone on the growth and yield of global staple crops with DSSAT v4.8.0**

**Jose Rafael Guarin et al.**

*Correspondence to:* Jose Rafael Guarin ([j.guarin@columbia.edu](mailto:j.guarin@columbia.edu))

The copyright of individual parts of the supplement might differ from the article licence.

## Supplementary Tables

**Table S1: Soil lower limit (LL), drained upper limit (DUL), and saturation (SAT) at varying depths for the soil series at the experimental locations simulated. Values determined from USDA Web Soil Survey database (Nrcs, 2023).**

| Depth (cm) | Champaign, IL Drummer silty clay loam |       |       | Champaign, IL Flanagan silt loam |       |       | Stuttgart, AR Dewitt silt loam |       |       | Maricopa, AZ Trix clay loam |       |       |
|------------|---------------------------------------|-------|-------|----------------------------------|-------|-------|--------------------------------|-------|-------|-----------------------------|-------|-------|
|            | LL                                    | DUL   | SAT   | LL                               | DUL   | SAT   | LL                             | DUL   | SAT   | LL                          | DUL   | SAT   |
| 5          | 0.171                                 | 0.349 | 0.481 | 0.136                            | 0.321 | 0.463 | 0.166                          | 0.360 | 0.424 | 0.202                       | 0.320 | 0.417 |
| 10         | 0.171                                 | 0.349 | 0.481 | 0.136                            | 0.321 | 0.463 | 0.166                          | 0.360 | 0.424 | 0.201                       | 0.319 | 0.424 |
| 15         | 0.171                                 | 0.349 | 0.481 | 0.136                            | 0.321 | 0.463 | 0.157                          | 0.346 | 0.425 | 0.201                       | 0.319 | 0.424 |
| 20         | 0.171                                 | 0.349 | 0.481 | 0.136                            | 0.321 | 0.463 | 0.157                          | 0.346 | 0.425 | 0.199                       | 0.319 | 0.424 |
| 30         | 0.171                                 | 0.349 | 0.481 | 0.160                            | 0.342 | 0.463 | 0.121                          | 0.290 | 0.431 | 0.199                       | 0.319 | 0.424 |
| 40         | 0.171                                 | 0.349 | 0.478 | 0.160                            | 0.342 | 0.463 | 0.121                          | 0.290 | 0.431 | 0.198                       | 0.318 | 0.419 |
| 50         | 0.171                                 | 0.349 | 0.470 | 0.178                            | 0.357 | 0.456 | 0.121                          | 0.290 | 0.431 | 0.198                       | 0.318 | 0.419 |
| 60         | 0.171                                 | 0.349 | 0.470 | 0.206                            | 0.382 | 0.445 | 0.168                          | 0.342 | 0.446 | 0.198                       | 0.318 | 0.387 |
| 70         | 0.171                                 | 0.349 | 0.470 | 0.206                            | 0.382 | 0.445 | 0.239                          | 0.420 | 0.468 | 0.198                       | 0.318 | 0.387 |
| 90         | 0.171                                 | 0.349 | 0.470 | 0.193                            | 0.369 | 0.445 | 0.239                          | 0.420 | 0.468 | 0.186                       | 0.299 | 0.359 |
| 110        | 0.160                                 | 0.332 | 0.460 | 0.177                            | 0.354 | 0.445 | 0.239                          | 0.420 | 0.468 | 0.159                       | 0.275 | 0.347 |
| 130        | 0.135                                 | 0.266 | 0.409 | 0.141                            | 0.302 | 0.387 | 0.239                          | 0.420 | 0.468 | 0.159                       | 0.275 | 0.347 |
| 150        | 0.131                                 | 0.253 | 0.391 | 0.121                            | 0.266 | 0.319 | 0.239                          | 0.420 | 0.468 | 0.136                       | 0.254 | 0.336 |
| 170        | 0.131                                 | 0.253 | 0.391 | 0.121                            | 0.266 | 0.319 | 0.239                          | 0.420 | 0.468 | 0.136                       | 0.254 | 0.336 |
| 190        | 0.131                                 | 0.253 | 0.391 | 0.121                            | 0.266 | 0.319 | 0.239                          | 0.420 | 0.468 | 0.128                       | 0.244 | 0.331 |
| 210        | 0.131                                 | 0.253 | 0.391 | 0.121                            | 0.266 | 0.319 | 0.239                          | 0.420 | 0.468 | 0.128                       | 0.244 | 0.331 |

**Table S2: CERES-Maize simulated yield (kg ha<sup>-1</sup>) for sensitivity analysis of FOZ<sub>1</sub> values (SFOZ<sub>1</sub> = 0.0) for 2018 FACE experiment at Champaign, IL, USA. “Dry” treatment = 50% rainfall and “Wet” treatment = normal rainfall. CO<sub>2</sub> was either a constant 350 ppm or 550 ppm. All treatments used cv. B73xHp301.**

| M7 Ozone (ppb) | Treatment  | FOZ <sub>1</sub> = 1.0 | FOZ <sub>1</sub> = 0.9 | FOZ <sub>1</sub> = 0.8 | FOZ <sub>1</sub> = 0.7 | FOZ <sub>1</sub> = 0.6 | FOZ <sub>1</sub> = 0.5 | FOZ <sub>1</sub> = 0.4 | FOZ <sub>1</sub> = 0.3 | FOZ <sub>1</sub> = 0.2 | FOZ <sub>1</sub> = 0.1 | FOZ <sub>1</sub> = 0.0 |
|----------------|------------|------------------------|------------------------|------------------------|------------------------|------------------------|------------------------|------------------------|------------------------|------------------------|------------------------|------------------------|
| 0              | Dry_350ppm | 8976                   | 8976                   | 8976                   | 8976                   | 8976                   | 8976                   | 8976                   | 8976                   | 8976                   | 8976                   | 8976                   |
| 25             | Dry_350ppm | 8976                   | 8976                   | 8976                   | 8976                   | 8976                   | 8976                   | 8976                   | 8976                   | 8976                   | 8976                   | 8976                   |
| 40             | Dry_350ppm | 7697                   | 7826                   | 7958                   | 8088                   | 8221                   | 8359                   | 8490                   | 8631                   | 8760                   | 8894                   | 8976                   |
| 50             | Dry_350ppm | 6801                   | 7037                   | 7257                   | 7472                   | 7697                   | 7918                   | 8130                   | 8359                   | 8580                   | 8802                   | 8976                   |
| 60             | Dry_350ppm | 5880                   | 6193                   | 6543                   | 6843                   | 7165                   | 7472                   | 7782                   | 8088                   | 8402                   | 8717                   | 8976                   |
| 70             | Dry_350ppm | 4939                   | 5356                   | 5797                   | 6193                   | 6632                   | 7037                   | 7422                   | 7826                   | 8221                   | 8631                   | 8976                   |
| 80             | Dry_350ppm | 4018                   | 4551                   | 5026                   | 5554                   | 6055                   | 6586                   | 7076                   | 7553                   | 8044                   | 8535                   | 8976                   |
| 90             | Dry_350ppm | 2969                   | 3667                   | 4312                   | 4905                   | 5503                   | 6096                   | 6717                   | 7294                   | 7873                   | 8445                   | 8976                   |
| 100            | Dry_350ppm | 1652                   | 2744                   | 3501                   | 4260                   | 4939                   | 5660                   | 6338                   | 7037                   | 7697                   | 8359                   | 8976                   |
| 120            | Dry_350ppm | 41                     | 399                    | 1492                   | 2828                   | 3827                   | 4728                   | 5611                   | 6483                   | 7338                   | 8175                   | 8976                   |
| 0              | Wet_350ppm | 9853                   | 9853                   | 9853                   | 9853                   | 9853                   | 9853                   | 9853                   | 9853                   | 9853                   | 9853                   | 9853                   |
| 25             | Wet_350ppm | 9853                   | 9853                   | 9853                   | 9853                   | 9853                   | 9853                   | 9853                   | 9853                   | 9853                   | 9853                   | 9853                   |
| 40             | Wet_350ppm | 8458                   | 8605                   | 8752                   | 8899                   | 9046                   | 9192                   | 9337                   | 9479                   | 9622                   | 9765                   | 9853                   |
| 50             | Wet_350ppm | 7472                   | 7718                   | 7965                   | 8211                   | 8458                   | 8703                   | 8948                   | 9192                   | 9432                   | 9670                   | 9853                   |
| 60             | Wet_350ppm | 6488                   | 6833                   | 7178                   | 7521                   | 7866                   | 8211                   | 8556                   | 8899                   | 9240                   | 9574                   | 9853                   |
| 70             | Wet_350ppm | 5484                   | 5944                   | 6389                   | 6833                   | 7276                   | 7718                   | 8162                   | 8605                   | 9046                   | 9479                   | 9853                   |
| 80             | Wet_350ppm | 4324                   | 4982                   | 5586                   | 6145                   | 6685                   | 7227                   | 7767                   | 8310                   | 8850                   | 9384                   | 9853                   |
| 90             | Wet_350ppm | 2934                   | 3904                   | 4686                   | 5431                   | 6095                   | 6735                   | 7375                   | 8014                   | 8654                   | 9289                   | 9853                   |
| 100            | Wet_350ppm | 1435                   | 2606                   | 3653                   | 4626                   | 5484                   | 6243                   | 6980                   | 7718                   | 8458                   | 9192                   | 9853                   |
| 120            | Wet_350ppm | 41                     | 384                    | 1286                   | 2729                   | 4083                   | 5207                   | 6194                   | 7129                   | 8063                   | 8997                   | 9853                   |
| 0              | Dry_550ppm | 9612                   | 9612                   | 9612                   | 9612                   | 9612                   | 9612                   | 9612                   | 9612                   | 9612                   | 9612                   | 9612                   |
| 25             | Dry_550ppm | 9612                   | 9612                   | 9612                   | 9612                   | 9612                   | 9612                   | 9612                   | 9612                   | 9612                   | 9612                   | 9612                   |
| 40             | Dry_550ppm | 8557                   | 8705                   | 8845                   | 8998                   | 9150                   | 9307                   | 9463                   | 9612                   | 9612                   | 9612                   | 9612                   |
| 50             | Dry_550ppm | 7547                   | 7791                   | 8045                   | 8298                   | 8557                   | 8801                   | 9050                   | 9307                   | 9568                   | 9612                   | 9612                   |
| 60             | Dry_550ppm | 6531                   | 6898                   | 7257                   | 7593                   | 7942                   | 8298                   | 8655                   | 8998                   | 9357                   | 9612                   | 9612                   |
| 70             | Dry_550ppm | 5497                   | 5959                   | 6429                   | 6898                   | 7358                   | 7791                   | 8248                   | 8705                   | 9150                   | 9612                   | 9612                   |
| 80             | Dry_550ppm | 4414                   | 5028                   | 5607                   | 6169                   | 6749                   | 7306                   | 7839                   | 8405                   | 8948                   | 9515                   | 9612                   |
| 90             | Dry_550ppm | 3260                   | 4049                   | 4722                   | 5442                   | 6113                   | 6796                   | 7449                   | 8093                   | 8754                   | 9408                   | 9612                   |
| 100            | Dry_550ppm | 1931                   | 3006                   | 3880                   | 4677                   | 5497                   | 6278                   | 7048                   | 7791                   | 8557                   | 9307                   | 9612                   |
| 120            | Dry_550ppm | 46                     | 466                    | 1762                   | 3109                   | 4208                   | 5233                   | 6223                   | 7212                   | 8141                   | 9100                   | 9612                   |
| 0              | Wet_550ppm | 10242                  | 10242                  | 10242                  | 10242                  | 10242                  | 10242                  | 10242                  | 10242                  | 10242                  | 10242                  | 10242                  |
| 25             | Wet_550ppm | 10242                  | 10242                  | 10242                  | 10242                  | 10242                  | 10242                  | 10242                  | 10242                  | 10242                  | 10242                  | 10242                  |
| 40             | Wet_550ppm | 9158                   | 9316                   | 9471                   | 9626                   | 9780                   | 9935                   | 10090                  | 10242                  | 10242                  | 10242                  | 10242                  |
| 50             | Wet_550ppm | 8094                   | 8362                   | 8628                   | 8894                   | 9158                   | 9420                   | 9677                   | 9935                   | 10194                  | 10242                  | 10242                  |
| 60             | Wet_550ppm | 7028                   | 7400                   | 7772                   | 8147                   | 8522                   | 8894                   | 9264                   | 9626                   | 9987                   | 10242                  | 10242                  |
| 70             | Wet_550ppm | 5958                   | 6440                   | 6921                   | 7400                   | 7880                   | 8362                   | 8841                   | 9316                   | 9780                   | 10242                  | 10242                  |
| 80             | Wet_550ppm | 4786                   | 5460                   | 6068                   | 6654                   | 7241                   | 7826                   | 8415                   | 9000                   | 9574                   | 10142                  | 10242                  |
| 90             | Wet_550ppm | 3385                   | 4331                   | 5158                   | 5904                   | 6600                   | 7294                   | 7987                   | 8681                   | 9368                   | 10038                  | 10242                  |
| 100            | Wet_550ppm | 1766                   | 2978                   | 4135                   | 5098                   | 5958                   | 6761                   | 7559                   | 8362                   | 9158                   | 9935                   | 10242                  |
| 120            | Wet_550ppm | 46                     | 445                    | 1578                   | 3126                   | 4528                   | 5683                   | 6708                   | 7719                   | 8734                   | 9729                   | 10242                  |

**Table S3: CERES-Maize simulated yield (kg ha<sup>-1</sup>) for sensitivity analysis of SFOZ<sub>1</sub> values (FOZ<sub>1</sub> = 0.0) for 2018 FACE experiment at Champaign, IL, USA. “Dry” treatment = 50% rainfall and “Wet” treatment = normal rainfall. CO<sub>2</sub> was either a constant 350 ppm or 550 ppm. All treatments used cv. B73xHp301.**

| M7 Ozone (ppb) | Treatment  | SFOZ <sub>1</sub> = 1.0 | SFOZ <sub>1</sub> = 0.9 | SFOZ <sub>1</sub> = 0.8 | SFOZ <sub>1</sub> = 0.7 | SFOZ <sub>1</sub> = 0.6 | SFOZ <sub>1</sub> = 0.5 | SFOZ <sub>1</sub> = 0.4 | SFOZ <sub>1</sub> = 0.3 | SFOZ <sub>1</sub> = 0.2 | SFOZ <sub>1</sub> = 0.1 | SFOZ <sub>1</sub> = 0.0 |
|----------------|------------|-------------------------|-------------------------|-------------------------|-------------------------|-------------------------|-------------------------|-------------------------|-------------------------|-------------------------|-------------------------|-------------------------|
| 0              | Dry_350ppm | 8976                    | 8976                    | 8976                    | 8976                    | 8976                    | 8976                    | 8976                    | 8976                    | 8976                    | 8976                    | 8976                    |
| 25             | Dry_350ppm | 8976                    | 8976                    | 8976                    | 8976                    | 8976                    | 8976                    | 8976                    | 8976                    | 8976                    | 8976                    | 8976                    |
| 40             | Dry_350ppm | 8400                    | 8432                    | 8509                    | 8572                    | 8625                    | 8708                    | 8782                    | 8883                    | 8956                    | 8966                    | 8976                    |
| 50             | Dry_350ppm | 7996                    | 8076                    | 8186                    | 8325                    | 8400                    | 8473                    | 8589                    | 8708                    | 8856                    | 8960                    | 8976                    |
| 60             | Dry_350ppm | 6483                    | 6979                    | 7553                    | 8011                    | 8128                    | 8325                    | 8425                    | 8572                    | 8731                    | 8934                    | 8976                    |
| 70             | Dry_350ppm | 4776                    | 5492                    | 6294                    | 6979                    | 7725                    | 8076                    | 8300                    | 8432                    | 8625                    | 8883                    | 8976                    |
| 80             | Dry_350ppm | 3485                    | 4044                    | 4887                    | 5867                    | 6746                    | 7591                    | 8091                    | 8357                    | 8547                    | 8831                    | 8976                    |
| 90             | Dry_350ppm | 2527                    | 3136                    | 3816                    | 4722                    | 5808                    | 6859                    | 7798                    | 8208                    | 8454                    | 8755                    | 8976                    |
| 100            | Dry_350ppm | 1852                    | 2379                    | 2929                    | 3773                    | 4776                    | 6049                    | 7176                    | 8076                    | 8400                    | 8708                    | 8976                    |
| 120            | Dry_350ppm | 972                     | 1289                    | 1809                    | 2437                    | 3251                    | 4398                    | 5991                    | 7442                    | 8234                    | 8610                    | 8976                    |
| 0              | Wet_350ppm | 9853                    | 9853                    | 9853                    | 9853                    | 9853                    | 9853                    | 9853                    | 9853                    | 9853                    | 9853                    | 9853                    |
| 25             | Wet_350ppm | 9853                    | 9853                    | 9853                    | 9853                    | 9853                    | 9853                    | 9853                    | 9853                    | 9853                    | 9853                    | 9853                    |
| 40             | Wet_350ppm | 9004                    | 9119                    | 9231                    | 9340                    | 9446                    | 9548                    | 9648                    | 9744                    | 9828                    | 9841                    | 9853                    |
| 50             | Wet_350ppm | 8173                    | 8389                    | 8600                    | 8806                    | 9004                    | 9194                    | 9375                    | 9548                    | 9713                    | 9833                    | 9853                    |
| 60             | Wet_350ppm | 6222                    | 6928                    | 7652                    | 8217                    | 8516                    | 8806                    | 9081                    | 9340                    | 9582                    | 9805                    | 9853                    |
| 70             | Wet_350ppm | 4497                    | 5246                    | 6033                    | 6928                    | 7832                    | 8389                    | 8765                    | 9119                    | 9446                    | 9744                    | 9853                    |
| 80             | Wet_350ppm | 3360                    | 3898                    | 4714                    | 5609                    | 6549                    | 7787                    | 8431                    | 8886                    | 9304                    | 9681                    | 9853                    |
| 90             | Wet_350ppm | 2437                    | 2930                    | 3679                    | 4444                    | 5550                    | 6740                    | 7921                    | 8642                    | 9157                    | 9615                    | 9853                    |
| 100            | Wet_350ppm | 1789                    | 2296                    | 2824                    | 3637                    | 4497                    | 5794                    | 7224                    | 8389                    | 9004                    | 9548                    | 9853                    |
| 120            | Wet_350ppm | 1017                    | 1250                    | 1747                    | 2351                    | 3134                    | 4241                    | 5735                    | 7545                    | 8683                    | 9411                    | 9853                    |
| 0              | Dry_550ppm | 9612                    | 9612                    | 9612                    | 9612                    | 9612                    | 9612                    | 9612                    | 9612                    | 9612                    | 9612                    | 9612                    |
| 25             | Dry_550ppm | 9612                    | 9612                    | 9612                    | 9612                    | 9612                    | 9612                    | 9612                    | 9612                    | 9612                    | 9612                    | 9612                    |
| 40             | Dry_550ppm | 8931                    | 9000                    | 9080                    | 9156                    | 9239                    | 9325                    | 9424                    | 9519                    | 9594                    | 9605                    | 9612                    |
| 50             | Dry_550ppm | 8523                    | 8614                    | 8737                    | 8823                    | 8931                    | 9057                    | 9181                    | 9325                    | 9490                    | 9599                    | 9612                    |
| 60             | Dry_550ppm | 6843                    | 7532                    | 8142                    | 8547                    | 8673                    | 8823                    | 8978                    | 9156                    | 9355                    | 9574                    | 9612                    |
| 70             | Dry_550ppm | 5045                    | 5863                    | 6724                    | 7532                    | 8199                    | 8614                    | 8812                    | 9000                    | 9239                    | 9519                    | 9612                    |
| 80             | Dry_550ppm | 3687                    | 4438                    | 5162                    | 6246                    | 7274                    | 8170                    | 8631                    | 8864                    | 9134                    | 9459                    | 9612                    |
| 90             | Dry_550ppm | 2756                    | 3321                    | 4034                    | 4988                    | 6118                    | 7370                    | 8467                    | 8755                    | 9016                    | 9385                    | 9612                    |
| 100            | Dry_550ppm | 1966                    | 2524                    | 3206                    | 3988                    | 5045                    | 6366                    | 7729                    | 8614                    | 8931                    | 9325                    | 9612                    |
| 120            | Dry_550ppm | 1105                    | 1458                    | 1919                    | 2585                    | 3520                    | 4648                    | 6306                    | 7999                    | 8779                    | 9212                    | 9612                    |
| 0              | Wet_550ppm | 10242                   | 10242                   | 10242                   | 10242                   | 10242                   | 10242                   | 10242                   | 10242                   | 10242                   | 10242                   | 10242                   |
| 25             | Wet_550ppm | 10242                   | 10242                   | 10242                   | 10242                   | 10242                   | 10242                   | 10242                   | 10242                   | 10242                   | 10242                   | 10242                   |
| 40             | Wet_550ppm | 9376                    | 9492                    | 9606                    | 9717                    | 9825                    | 9930                    | 10032                   | 10130                   | 10216                   | 10230                   | 10242                   |
| 50             | Wet_550ppm | 8540                    | 8760                    | 8970                    | 9176                    | 9376                    | 9568                    | 9753                    | 9930                    | 10098                   | 10221                   | 10242                   |
| 60             | Wet_550ppm | 6624                    | 7321                    | 8098                    | 8584                    | 8887                    | 9176                    | 9453                    | 9717                    | 9965                    | 10193                   | 10242                   |
| 70             | Wet_550ppm | 4851                    | 5580                    | 6407                    | 7321                    | 8189                    | 8760                    | 9135                    | 9492                    | 9825                    | 10130                   | 10242                   |
| 80             | Wet_550ppm | 3541                    | 4107                    | 4964                    | 5963                    | 7006                    | 8143                    | 8803                    | 9257                    | 9680                    | 10066                   | 10242                   |
| 90             | Wet_550ppm | 2575                    | 3189                    | 3876                    | 4796                    | 5833                    | 7068                    | 8450                    | 9012                    | 9530                    | 9999                    | 10242                   |
| 100            | Wet_550ppm | 1890                    | 2425                    | 2981                    | 3832                    | 4851                    | 6150                    | 7652                    | 8760                    | 9376                    | 9930                    | 10242                   |
| 120            | Wet_550ppm | 1071                    | 1406                    | 1845                    | 2484                    | 3305                    | 4467                    | 6024                    | 7956                    | 9053                    | 9789                    | 10242                   |

**Table S4: CERES-Rice simulated yield (kg ha<sup>-1</sup>) for sensitivity analysis of FOZ<sub>1</sub> values (SFOZ<sub>1</sub> = 0.0) for 2009 experiment at Stuttgart, AR, USA. “Dry” treatment = 50% rainfall and “Wet” treatment = normal rainfall. CO<sub>2</sub> was either a constant 350 ppm or 550 ppm. All treatments used the default DSSAT cv. N. America.**

| M7 Ozone (ppb) | Treatment  | FOZ <sub>1</sub> = 1.0 | FOZ <sub>1</sub> = 0.9 | FOZ <sub>1</sub> = 0.8 | FOZ <sub>1</sub> = 0.7 | FOZ <sub>1</sub> = 0.6 | FOZ <sub>1</sub> = 0.5 | FOZ <sub>1</sub> = 0.4 | FOZ <sub>1</sub> = 0.3 | FOZ <sub>1</sub> = 0.2 | FOZ <sub>1</sub> = 0.1 | FOZ <sub>1</sub> = 0.0 |
|----------------|------------|------------------------|------------------------|------------------------|------------------------|------------------------|------------------------|------------------------|------------------------|------------------------|------------------------|------------------------|
| 0              | Dry_350ppm | 11299                  | 11299                  | 11299                  | 11299                  | 11299                  | 11299                  | 11299                  | 11299                  | 11299                  | 11299                  | 11299                  |
| 25             | Dry_350ppm | 11299                  | 11299                  | 11299                  | 11299                  | 11299                  | 11299                  | 11299                  | 11299                  | 11299                  | 11299                  | 11299                  |
| 40             | Dry_350ppm | 10143                  | 10297                  | 10450                  | 10609                  | 10765                  | 10902                  | 11010                  | 11113                  | 11215                  | 11298                  | 11299                  |
| 50             | Dry_350ppm | 8959                   | 9262                   | 9588                   | 9862                   | 10143                  | 10410                  | 10657                  | 10902                  | 11067                  | 11271                  | 11299                  |
| 60             | Dry_350ppm | 7554                   | 8251                   | 8642                   | 9012                   | 9443                   | 9862                   | 10269                  | 10609                  | 10939                  | 11187                  | 11299                  |
| 70             | Dry_350ppm | 6069                   | 6851                   | 7438                   | 8251                   | 8739                   | 9262                   | 9801                   | 10297                  | 10765                  | 11113                  | 11299                  |
| 80             | Dry_350ppm | 4347                   | 5239                   | 6258                   | 7137                   | 8069                   | 8698                   | 9320                   | 9970                   | 10556                  | 11034                  | 11299                  |
| 90             | Dry_350ppm | 2877                   | 3847                   | 4802                   | 5986                   | 7077                   | 8123                   | 8850                   | 9645                   | 10363                  | 10976                  | 11299                  |
| 100            | Dry_350ppm | 1393                   | 2487                   | 3626                   | 4689                   | 6069                   | 7270                   | 8409                   | 9262                   | 10143                  | 10902                  | 11299                  |
| 120            | Dry_350ppm | 25                     | 270                    | 1162                   | 2637                   | 4074                   | 5622                   | 7203                   | 8583                   | 9704                   | 10713                  | 11299                  |
| 0              | Wet_350ppm | 12616                  | 12616                  | 12616                  | 12616                  | 12616                  | 12616                  | 12616                  | 12616                  | 12616                  | 12616                  | 12616                  |
| 25             | Wet_350ppm | 12616                  | 12616                  | 12616                  | 12616                  | 12616                  | 12616                  | 12616                  | 12616                  | 12616                  | 12616                  | 12616                  |
| 40             | Wet_350ppm | 11225                  | 11397                  | 11570                  | 11734                  | 11915                  | 12059                  | 12234                  | 12405                  | 12553                  | 12615                  | 12616                  |
| 50             | Wet_350ppm | 9863                   | 10221                  | 10554                  | 10912                  | 11225                  | 11517                  | 11793                  | 12059                  | 12355                  | 12581                  | 12616                  |
| 60             | Wet_350ppm | 8337                   | 8916                   | 9445                   | 9932                   | 10422                  | 10912                  | 11339                  | 11734                  | 12145                  | 12516                  | 12616                  |
| 70             | Wet_350ppm | 6067                   | 6872                   | 7657                   | 8916                   | 9580                   | 10221                  | 10845                  | 11397                  | 11915                  | 12405                  | 12616                  |
| 80             | Wet_350ppm | 4539                   | 5359                   | 6230                   | 7223                   | 8684                   | 9517                   | 10288                  | 11045                  | 11682                  | 12298                  | 12616                  |
| 90             | Wet_350ppm | 2951                   | 3965                   | 4999                   | 5989                   | 7140                   | 8778                   | 9723                   | 10620                  | 11453                  | 12182                  | 12616                  |
| 100            | Wet_350ppm | 1473                   | 2542                   | 3721                   | 4922                   | 6067                   | 7397                   | 9135                   | 10221                  | 11225                  | 12059                  | 12616                  |
| 120            | Wet_350ppm | 25                     | 280                    | 1241                   | 2706                   | 4205                   | 5659                   | 7313                   | 9354                   | 10695                  | 11861                  | 12616                  |
| 0              | Dry_550ppm | 13054                  | 13054                  | 13054                  | 13054                  | 13054                  | 13054                  | 13054                  | 13054                  | 13054                  | 13054                  | 13054                  |
| 25             | Dry_550ppm | 13054                  | 13054                  | 13054                  | 13054                  | 13054                  | 13054                  | 13054                  | 13054                  | 13054                  | 13054                  | 13054                  |
| 40             | Dry_550ppm | 12997                  | 13054                  | 13054                  | 13054                  | 13054                  | 13054                  | 13054                  | 13054                  | 13054                  | 13054                  | 13054                  |
| 50             | Dry_550ppm | 12048                  | 12350                  | 12617                  | 12874                  | 12997                  | 13054                  | 13054                  | 13054                  | 13054                  | 13054                  | 13054                  |
| 60             | Dry_550ppm | 10670                  | 11234                  | 11658                  | 12077                  | 12521                  | 12874                  | 13054                  | 13054                  | 13054                  | 13054                  | 13054                  |
| 70             | Dry_550ppm | 9064                   | 9712                   | 10500                  | 11234                  | 11718                  | 12350                  | 12820                  | 13054                  | 13054                  | 13054                  | 13054                  |
| 80             | Dry_550ppm | 7026                   | 8335                   | 9208                   | 10058                  | 10961                  | 11709                  | 12408                  | 12968                  | 13054                  | 13054                  | 13054                  |
| 90             | Dry_550ppm | 4614                   | 6150                   | 7675                   | 8976                   | 9983                   | 11064                  | 11962                  | 12661                  | 13054                  | 13054                  | 13054                  |
| 100            | Dry_550ppm | 2621                   | 4150                   | 5780                   | 7585                   | 9064                   | 10227                  | 11456                  | 12350                  | 12997                  | 13054                  | 13054                  |
| 120            | Dry_550ppm | 43                     | 462                    | 2420                   | 4353                   | 6520                   | 8646                   | 10144                  | 11610                  | 12686                  | 13054                  | 13054                  |
| 0              | Wet_550ppm | 14106                  | 14106                  | 14106                  | 14106                  | 14106                  | 14106                  | 14106                  | 14106                  | 14106                  | 14106                  | 14106                  |
| 25             | Wet_550ppm | 14106                  | 14106                  | 14106                  | 14106                  | 14106                  | 14106                  | 14106                  | 14106                  | 14106                  | 14106                  | 14106                  |
| 40             | Wet_550ppm | 14096                  | 14106                  | 14106                  | 14106                  | 14106                  | 14106                  | 14106                  | 14106                  | 14106                  | 14106                  | 14106                  |
| 50             | Wet_550ppm | 13094                  | 13411                  | 13675                  | 13931                  | 14096                  | 14106                  | 14106                  | 14106                  | 14106                  | 14106                  | 14106                  |
| 60             | Wet_550ppm | 11483                  | 12092                  | 12658                  | 13175                  | 13567                  | 13931                  | 14106                  | 14106                  | 14106                  | 14106                  | 14106                  |
| 70             | Wet_550ppm | 9702                   | 10575                  | 11329                  | 12092                  | 12813                  | 13411                  | 13901                  | 14106                  | 14106                  | 14106                  | 14106                  |
| 80             | Wet_550ppm | 6924                   | 8738                   | 9899                   | 10905                  | 11846                  | 12728                  | 13462                  | 14017                  | 14106                  | 14106                  | 14106                  |
| 90             | Wet_550ppm | 4789                   | 6095                   | 7624                   | 9610                   | 10824                  | 11925                  | 12967                  | 13755                  | 14106                  | 14106                  | 14106                  |
| 100            | Wet_550ppm | 2669                   | 4244                   | 5788                   | 7512                   | 9702                   | 11068                  | 12340                  | 13411                  | 14096                  | 14106                  | 14106                  |
| 120            | Wet_550ppm | 43                     | 494                    | 2457                   | 4467                   | 6422                   | 9194                   | 10990                  | 12575                  | 13792                  | 14106                  | 14106                  |

**Table S5: CERES-Rice simulated yield (kg ha<sup>-1</sup>) for sensitivity analysis of SFOZ<sub>1</sub> values (FOZ<sub>1</sub> = 0.0) for 2009 experiment at Stuttgart, AR, USA. “Dry” treatment = 50% rainfall and “Wet” treatment = normal rainfall. CO<sub>2</sub> was either a constant 350 ppm or 550 ppm. All treatments used the default DSSAT cv. N. America.**

| M7 Ozone (ppb) | Treatment  | SFOZ <sub>1</sub> = 1.0 | SFOZ <sub>1</sub> = 0.9 | SFOZ <sub>1</sub> = 0.8 | SFOZ <sub>1</sub> = 0.7 | SFOZ <sub>1</sub> = 0.6 | SFOZ <sub>1</sub> = 0.5 | SFOZ <sub>1</sub> = 0.4 | SFOZ <sub>1</sub> = 0.3 | SFOZ <sub>1</sub> = 0.2 | SFOZ <sub>1</sub> = 0.1 | SFOZ <sub>1</sub> = 0.0 |
|----------------|------------|-------------------------|-------------------------|-------------------------|-------------------------|-------------------------|-------------------------|-------------------------|-------------------------|-------------------------|-------------------------|-------------------------|
| 0              | Dry_350ppm | 11299                   | 11299                   | 11299                   | 11299                   | 11299                   | 11299                   | 11299                   | 11299                   | 11299                   | 11299                   | 11299                   |
| 25             | Dry_350ppm | 11299                   | 11299                   | 11299                   | 11299                   | 11299                   | 11299                   | 11299                   | 11299                   | 11299                   | 11299                   | 11299                   |
| 40             | Dry_350ppm | 10832                   | 10912                   | 10987                   | 11058                   | 11159                   | 11213                   | 11243                   | 11259                   | 11270                   | 11277                   | 11299                   |
| 50             | Dry_350ppm | 10308                   | 10450                   | 10565                   | 10688                   | 10832                   | 10960                   | 11120                   | 11213                   | 11255                   | 11278                   | 11299                   |
| 60             | Dry_350ppm | 9869                    | 10039                   | 10104                   | 10310                   | 10505                   | 10688                   | 10884                   | 11058                   | 11225                   | 11270                   | 11299                   |
| 70             | Dry_350ppm | 9642                    | 9643                    | 9817                    | 10039                   | 10189                   | 10450                   | 10662                   | 10912                   | 11159                   | 11259                   | 11299                   |
| 80             | Dry_350ppm | 9686                    | 9599                    | 9661                    | 9659                    | 9963                    | 10126                   | 10451                   | 10742                   | 11035                   | 11250                   | 11299                   |
| 90             | Dry_350ppm | 9520                    | 9572                    | 9572                    | 9649                    | 9631                    | 9988                    | 10218                   | 10592                   | 10936                   | 11236                   | 11299                   |
| 100            | Dry_350ppm | 9440                    | 9507                    | 9570                    | 9640                    | 9642                    | 9720                    | 10102                   | 10450                   | 10832                   | 11213                   | 11299                   |
| 120            | Dry_350ppm | 9370                    | 9399                    | 9468                    | 9524                    | 9617                    | 9617                    | 9688                    | 10099                   | 10621                   | 11140                   | 11299                   |
| 0              | Wet_350ppm | 12616                   | 12616                   | 12616                   | 12616                   | 12616                   | 12616                   | 12616                   | 12616                   | 12616                   | 12616                   | 12616                   |
| 25             | Wet_350ppm | 12616                   | 12616                   | 12616                   | 12616                   | 12616                   | 12616                   | 12616                   | 12616                   | 12616                   | 12616                   | 12616                   |
| 40             | Wet_350ppm | 12106                   | 12177                   | 12263                   | 12323                   | 12401                   | 12452                   | 12480                   | 12531                   | 12575                   | 12608                   | 12616                   |
| 50             | Wet_350ppm | 11347                   | 11553                   | 11798                   | 11970                   | 12106                   | 12202                   | 12341                   | 12452                   | 12528                   | 12582                   | 12616                   |
| 60             | Wet_350ppm | 10818                   | 11115                   | 11103                   | 11386                   | 11666                   | 11970                   | 12153                   | 12323                   | 12449                   | 12580                   | 12616                   |
| 70             | Wet_350ppm | 10789                   | 10786                   | 10777                   | 11115                   | 11178                   | 11553                   | 11910                   | 12177                   | 12401                   | 12531                   | 12616                   |
| 80             | Wet_350ppm | 10944                   | 10795                   | 10803                   | 10761                   | 10976                   | 11127                   | 11589                   | 12001                   | 12280                   | 12516                   | 12616                   |
| 90             | Wet_350ppm | 10632                   | 10840                   | 10935                   | 10846                   | 10734                   | 11051                   | 11255                   | 11817                   | 12182                   | 12464                   | 12616                   |
| 100            | Wet_350ppm | 10513                   | 10608                   | 10794                   | 10920                   | 10789                   | 10760                   | 11231                   | 11553                   | 12106                   | 12452                   | 12616                   |
| 120            | Wet_350ppm | 10413                   | 10457                   | 10487                   | 10583                   | 10885                   | 10798                   | 10769                   | 11074                   | 11874                   | 12360                   | 12616                   |
| 0              | Dry_550ppm | 13054                   | 13054                   | 13054                   | 13054                   | 13054                   | 13054                   | 13054                   | 13054                   | 13054                   | 13054                   | 13054                   |
| 25             | Dry_550ppm | 13054                   | 13054                   | 13054                   | 13054                   | 13054                   | 13054                   | 13054                   | 13054                   | 13054                   | 13054                   | 13054                   |
| 40             | Dry_550ppm | 12677                   | 12746                   | 12803                   | 12844                   | 12887                   | 12919                   | 12925                   | 12973                   | 13029                   | 13063                   | 13054                   |
| 50             | Dry_550ppm | 12150                   | 12340                   | 12481                   | 12530                   | 12677                   | 12786                   | 12856                   | 12919                   | 12953                   | 13034                   | 13054                   |
| 60             | Dry_550ppm | 11759                   | 11943                   | 12047                   | 12239                   | 12440                   | 12530                   | 12716                   | 12844                   | 12899                   | 13020                   | 13054                   |
| 70             | Dry_550ppm | 11489                   | 11468                   | 11708                   | 11943                   | 12109                   | 12340                   | 12529                   | 12746                   | 12887                   | 12973                   | 13054                   |
| 80             | Dry_550ppm | 11573                   | 11433                   | 11483                   | 11586                   | 11855                   | 12087                   | 12370                   | 12598                   | 12833                   | 12939                   | 13054                   |
| 90             | Dry_550ppm | 11335                   | 11505                   | 11448                   | 11494                   | 11557                   | 11896                   | 12149                   | 12498                   | 12764                   | 12914                   | 13054                   |
| 100            | Dry_550ppm | 11215                   | 11310                   | 11456                   | 11523                   | 11489                   | 11631                   | 12037                   | 12340                   | 12677                   | 12919                   | 13054                   |
| 120            | Dry_550ppm | 11116                   | 11161                   | 11250                   | 11342                   | 11555                   | 11462                   | 11614                   | 12023                   | 12514                   | 12872                   | 13054                   |
| 0              | Wet_550ppm | 14106                   | 14106                   | 14106                   | 14106                   | 14106                   | 14106                   | 14106                   | 14106                   | 14106                   | 14106                   | 14106                   |
| 25             | Wet_550ppm | 14106                   | 14106                   | 14106                   | 14106                   | 14106                   | 14106                   | 14106                   | 14106                   | 14106                   | 14106                   | 14106                   |
| 40             | Wet_550ppm | 13697                   | 13785                   | 13857                   | 13883                   | 13926                   | 13964                   | 14011                   | 14065                   | 14094                   | 14102                   | 14106                   |
| 50             | Wet_550ppm | 13204                   | 13396                   | 13511                   | 13617                   | 13697                   | 13803                   | 13895                   | 13964                   | 14055                   | 14100                   | 14106                   |
| 60             | Wet_550ppm | 12674                   | 12895                   | 13019                   | 13277                   | 13452                   | 13617                   | 13737                   | 13883                   | 13982                   | 14091                   | 14106                   |
| 70             | Wet_550ppm | 12183                   | 12248                   | 12564                   | 12895                   | 13075                   | 13396                   | 13595                   | 13785                   | 13926                   | 14065                   | 14106                   |
| 80             | Wet_550ppm | 12223                   | 12232                   | 12181                   | 12373                   | 12778                   | 13046                   | 13438                   | 13639                   | 13834                   | 14034                   | 14106                   |
| 90             | Wet_550ppm | 12006                   | 12264                   | 12197                   | 12186                   | 12342                   | 12855                   | 13145                   | 13552                   | 13776                   | 13997                   | 14106                   |
| 100            | Wet_550ppm | 11841                   | 11974                   | 12206                   | 12172                   | 12183                   | 12433                   | 13006                   | 13396                   | 13697                   | 13964                   | 14106                   |
| 120            | Wet_550ppm | 11689                   | 11756                   | 11880                   | 11945                   | 12320                   | 12201                   | 12403                   | 12991                   | 13547                   | 13896                   | 14106                   |

**Table S6: CROPGRO-Soybean simulated yield (kg ha<sup>-1</sup>) for sensitivity analysis of FOZ<sub>1</sub> values (SFOZ<sub>1</sub> = 0.0) for 2010 SoyFACE experiment at Champaign, IL, USA. “Dry” treatment = 50% rainfall and “Wet” treatment = normal rainfall. CO<sub>2</sub> was either a constant 350 ppm or 550 ppm. All treatments used cv. Dwight93B.**

| <b>M7 Ozone<br/>(ppb)</b> | <b>Treatment</b> | <b>FOZ<sub>1</sub> =<br/>1.0</b> | <b>FOZ<sub>1</sub> =<br/>0.9</b> | <b>FOZ<sub>1</sub> =<br/>0.8</b> | <b>FOZ<sub>1</sub> =<br/>0.7</b> | <b>FOZ<sub>1</sub> =<br/>0.6</b> | <b>FOZ<sub>1</sub> =<br/>0.5</b> | <b>FOZ<sub>1</sub> =<br/>0.4</b> | <b>FOZ<sub>1</sub> =<br/>0.3</b> | <b>FOZ<sub>1</sub> =<br/>0.2</b> | <b>FOZ<sub>1</sub> =<br/>0.1</b> | <b>FOZ<sub>1</sub> =<br/>0.0</b> |
|---------------------------|------------------|----------------------------------|----------------------------------|----------------------------------|----------------------------------|----------------------------------|----------------------------------|----------------------------------|----------------------------------|----------------------------------|----------------------------------|----------------------------------|
| 0                         | Dry_350ppm       | 1939                             | 1939                             | 1939                             | 1939                             | 1939                             | 1939                             | 1939                             | 1939                             | 1939                             | 1939                             | 1939                             |
| 25                        | Dry_350ppm       | 1939                             | 1939                             | 1939                             | 1939                             | 1939                             | 1939                             | 1939                             | 1939                             | 1939                             | 1939                             | 1939                             |
| 40                        | Dry_350ppm       | 1694                             | 1726                             | 1759                             | 1793                             | 1827                             | 1859                             | 1893                             | 1927                             | 1939                             | 1939                             | 1939                             |
| 50                        | Dry_350ppm       | 1488                             | 1531                             | 1582                             | 1638                             | 1694                             | 1748                             | 1805                             | 1859                             | 1916                             | 1939                             | 1939                             |
| 60                        | Dry_350ppm       | 1307                             | 1372                             | 1429                             | 1497                             | 1561                             | 1638                             | 1716                             | 1794                             | 1870                             | 1939                             | 1939                             |
| 70                        | Dry_350ppm       | 1136                             | 1209                             | 1293                             | 1372                             | 1449                             | 1531                             | 1627                             | 1726                             | 1827                             | 1927                             | 1939                             |
| 80                        | Dry_350ppm       | 948                              | 1051                             | 1149                             | 1247                             | 1346                             | 1438                             | 1541                             | 1661                             | 1782                             | 1904                             | 1939                             |
| 90                        | Dry_350ppm       | 575                              | 824                              | 1007                             | 1128                             | 1237                             | 1356                             | 1467                             | 1594                             | 1737                             | 1881                             | 1939                             |
| 100                       | Dry_350ppm       | 190                              | 451                              | 774                              | 997                              | 1136                             | 1269                             | 1391                             | 1531                             | 1694                             | 1859                             | 1939                             |
| 120                       | Dry_350ppm       | 4                                | 41                               | 166                              | 500                              | 873                              | 1085                             | 1256                             | 1419                             | 1605                             | 1816                             | 1939                             |
| 0                         | Wet_350ppm       | 3948                             | 3948                             | 3948                             | 3948                             | 3948                             | 3948                             | 3948                             | 3948                             | 3948                             | 3948                             | 3948                             |
| 25                        | Wet_350ppm       | 3948                             | 3948                             | 3948                             | 3948                             | 3948                             | 3948                             | 3948                             | 3948                             | 3948                             | 3948                             | 3948                             |
| 40                        | Wet_350ppm       | 3319                             | 3405                             | 3492                             | 3578                             | 3659                             | 3746                             | 3830                             | 3916                             | 3948                             | 3948                             | 3948                             |
| 50                        | Wet_350ppm       | 2761                             | 2895                             | 3034                             | 3178                             | 3319                             | 3463                             | 3605                             | 3746                             | 3888                             | 3948                             | 3948                             |
| 60                        | Wet_350ppm       | 2229                             | 2412                             | 2596                             | 2787                             | 2979                             | 3178                             | 3377                             | 3578                             | 3774                             | 3948                             | 3948                             |
| 70                        | Wet_350ppm       | 1681                             | 1934                             | 2175                             | 2412                             | 2654                             | 2895                             | 3148                             | 3405                             | 3659                             | 3916                             | 3948                             |
| 80                        | Wet_350ppm       | 1145                             | 1436                             | 1737                             | 2042                             | 2334                             | 2622                             | 2924                             | 3235                             | 3549                             | 3859                             | 3948                             |
| 90                        | Wet_350ppm       | 559                              | 946                              | 1298                             | 1653                             | 2015                             | 2360                             | 2708                             | 3063                             | 3434                             | 3802                             | 3948                             |
| 100                       | Wet_350ppm       | 191                              | 441                              | 857                              | 1273                             | 1681                             | 2095                             | 2490                             | 2895                             | 3319                             | 3746                             | 3948                             |
| 120                       | Wet_350ppm       | 5                                | 41                               | 167                              | 486                              | 1041                             | 1545                             | 2069                             | 2569                             | 3093                             | 3633                             | 3948                             |
| 0                         | Dry_550ppm       | 2716                             | 2716                             | 2716                             | 2716                             | 2716                             | 2716                             | 2716                             | 2716                             | 2716                             | 2716                             | 2716                             |
| 25                        | Dry_550ppm       | 2716                             | 2716                             | 2716                             | 2716                             | 2716                             | 2716                             | 2716                             | 2716                             | 2716                             | 2716                             | 2716                             |
| 40                        | Dry_550ppm       | 2716                             | 2716                             | 2716                             | 2716                             | 2716                             | 2716                             | 2716                             | 2716                             | 2716                             | 2716                             | 2716                             |
| 50                        | Dry_550ppm       | 2561                             | 2655                             | 2716                             | 2716                             | 2716                             | 2716                             | 2716                             | 2716                             | 2716                             | 2716                             | 2716                             |
| 60                        | Dry_550ppm       | 2169                             | 2305                             | 2442                             | 2577                             | 2713                             | 2716                             | 2716                             | 2716                             | 2716                             | 2716                             | 2716                             |
| 70                        | Dry_550ppm       | 1775                             | 1935                             | 2130                             | 2305                             | 2483                             | 2655                             | 2716                             | 2716                             | 2716                             | 2716                             | 2716                             |
| 80                        | Dry_550ppm       | 1452                             | 1617                             | 1808                             | 2034                             | 2251                             | 2463                             | 2675                             | 2716                             | 2716                             | 2716                             | 2716                             |
| 90                        | Dry_550ppm       | 1140                             | 1353                             | 1545                             | 1759                             | 2014                             | 2269                             | 2523                             | 2716                             | 2716                             | 2716                             | 2716                             |
| 100                       | Dry_550ppm       | 594                              | 1055                             | 1293                             | 1530                             | 1775                             | 2074                             | 2364                             | 2655                             | 2716                             | 2716                             | 2716                             |
| 120                       | Dry_550ppm       | 9                                | 103                              | 527                              | 1100                             | 1396                             | 1692                             | 2054                             | 2421                             | 2716                             | 2716                             | 2716                             |
| 0                         | Wet_550ppm       | 4700                             | 4700                             | 4700                             | 4700                             | 4700                             | 4700                             | 4700                             | 4700                             | 4700                             | 4700                             | 4700                             |
| 25                        | Wet_550ppm       | 4700                             | 4700                             | 4700                             | 4700                             | 4700                             | 4700                             | 4700                             | 4700                             | 4700                             | 4700                             | 4700                             |
| 40                        | Wet_550ppm       | 4700                             | 4700                             | 4700                             | 4700                             | 4700                             | 4700                             | 4700                             | 4700                             | 4700                             | 4700                             | 4700                             |
| 50                        | Wet_550ppm       | 4393                             | 4581                             | 4700                             | 4700                             | 4700                             | 4700                             | 4700                             | 4700                             | 4700                             | 4700                             | 4700                             |
| 60                        | Wet_550ppm       | 3624                             | 3899                             | 4169                             | 4431                             | 4693                             | 4700                             | 4700                             | 4700                             | 4700                             | 4700                             | 4700                             |
| 70                        | Wet_550ppm       | 2849                             | 3192                             | 3547                             | 3899                             | 4245                             | 4581                             | 4700                             | 4700                             | 4700                             | 4700                             | 4700                             |
| 80                        | Wet_550ppm       | 2114                             | 2516                             | 2923                             | 3350                             | 3780                             | 4206                             | 4619                             | 4700                             | 4700                             | 4700                             | 4700                             |
| 90                        | Wet_550ppm       | 1364                             | 1854                             | 2333                             | 2810                             | 3311                             | 3821                             | 4319                             | 4700                             | 4700                             | 4700                             | 4700                             |
| 100                       | Wet_550ppm       | 571                              | 1190                             | 1742                             | 2298                             | 2849                             | 3430                             | 4015                             | 4581                             | 4700                             | 4700                             | 4700                             |
| 120                       | Wet_550ppm       | 9                                | 104                              | 503                              | 1257                             | 1965                             | 2664                             | 3390                             | 4129                             | 4700                             | 4700                             | 4700                             |

**Table S7: CROPGRO-Soybean simulated yield (kg ha<sup>-1</sup>) for sensitivity analysis of SFOZ<sub>1</sub> values (FOZ<sub>1</sub> = 0.0) for 2010 SoyFACE experiment at Champaign, IL, USA. “Dry” treatment = 50% rainfall and “Wet” treatment = normal rainfall. CO<sub>2</sub> was either a constant 350 ppm or 550 ppm. All treatments used cv. Dwight93B.**

| <b>M7 Ozone<br/>(ppb)</b> | <b>Treatment</b> | <b>SFOZ<sub>1</sub> =<br/>1.0</b> | <b>SFOZ<sub>1</sub> =<br/>0.9</b> | <b>SFOZ<sub>1</sub> =<br/>0.8</b> | <b>SFOZ<sub>1</sub> =<br/>0.7</b> | <b>SFOZ<sub>1</sub> =<br/>0.6</b> | <b>SFOZ<sub>1</sub> =<br/>0.5</b> | <b>SFOZ<sub>1</sub> =<br/>0.4</b> | <b>SFOZ<sub>1</sub> =<br/>0.3</b> | <b>SFOZ<sub>1</sub> =<br/>0.2</b> | <b>SFOZ<sub>1</sub> =<br/>0.1</b> | <b>SFOZ<sub>1</sub> =<br/>0.0</b> |
|---------------------------|------------------|-----------------------------------|-----------------------------------|-----------------------------------|-----------------------------------|-----------------------------------|-----------------------------------|-----------------------------------|-----------------------------------|-----------------------------------|-----------------------------------|-----------------------------------|
| 0                         | Dry_350ppm       | 1939                              | 1939                              | 1939                              | 1939                              | 1939                              | 1939                              | 1939                              | 1939                              | 1939                              | 1939                              | 1939                              |
| 25                        | Dry_350ppm       | 1939                              | 1939                              | 1939                              | 1939                              | 1939                              | 1939                              | 1939                              | 1939                              | 1939                              | 1939                              | 1939                              |
| 40                        | Dry_350ppm       | 1686                              | 1713                              | 1738                              | 1763                              | 1783                              | 1806                              | 1829                              | 1855                              | 1881                              | 1907                              | 1939                              |
| 50                        | Dry_350ppm       | 1573                              | 1595                              | 1622                              | 1656                              | 1686                              | 1729                              | 1770                              | 1806                              | 1845                              | 1890                              | 1939                              |
| 60                        | Dry_350ppm       | 1469                              | 1513                              | 1547                              | 1581                              | 1609                              | 1656                              | 1704                              | 1763                              | 1815                              | 1871                              | 1939                              |
| 70                        | Dry_350ppm       | 1150                              | 1346                              | 1455                              | 1513                              | 1557                              | 1595                              | 1651                              | 1713                              | 1783                              | 1855                              | 1939                              |
| 80                        | Dry_350ppm       | 789                               | 976                               | 1192                              | 1407                              | 1493                              | 1553                              | 1597                              | 1659                              | 1752                              | 1837                              | 1939                              |
| 90                        | Dry_350ppm       | 526                               | 687                               | 887                               | 1130                              | 1394                              | 1499                              | 1561                              | 1628                              | 1721                              | 1822                              | 1939                              |
| 100                       | Dry_350ppm       | 344                               | 473                               | 646                               | 870                               | 1150                              | 1430                              | 1527                              | 1595                              | 1686                              | 1806                              | 1939                              |
| 120                       | Dry_350ppm       | 140                               | 216                               | 329                               | 494                               | 729                               | 1052                              | 1418                              | 1541                              | 1635                              | 1774                              | 1939                              |
| 0                         | Wet_350ppm       | 3948                              | 3948                              | 3948                              | 3948                              | 3948                              | 3948                              | 3948                              | 3948                              | 3948                              | 3948                              | 3948                              |
| 25                        | Wet_350ppm       | 3948                              | 3948                              | 3948                              | 3948                              | 3948                              | 3948                              | 3948                              | 3948                              | 3948                              | 3948                              | 3948                              |
| 40                        | Wet_350ppm       | 2876                              | 2981                              | 3081                              | 3186                              | 3291                              | 3394                              | 3501                              | 3610                              | 3721                              | 3833                              | 3948                              |
| 50                        | Wet_350ppm       | 2209                              | 2368                              | 2534                              | 2704                              | 2876                              | 3049                              | 3221                              | 3394                              | 3573                              | 3757                              | 3948                              |
| 60                        | Wet_350ppm       | 1630                              | 1819                              | 2022                              | 2241                              | 2467                              | 2704                              | 2945                              | 3186                              | 3430                              | 3683                              | 3948                              |
| 70                        | Wet_350ppm       | 1158                              | 1360                              | 1579                              | 1819                              | 2082                              | 2368                              | 2670                              | 2981                              | 3291                              | 3610                              | 3948                              |
| 80                        | Wet_350ppm       | 793                               | 980                               | 1201                              | 1453                              | 1736                              | 2051                              | 2400                              | 2773                              | 3152                              | 3537                              | 3948                              |
| 90                        | Wet_350ppm       | 532                               | 691                               | 892                               | 1137                              | 1430                              | 1763                              | 2145                              | 2568                              | 3014                              | 3466                              | 3948                              |
| 100                       | Wet_350ppm       | 350                               | 479                               | 650                               | 874                               | 1158                              | 1502                              | 1904                              | 2368                              | 2876                              | 3394                              | 3948                              |
| 120                       | Wet_350ppm       | 144                               | 222                               | 336                               | 500                               | 733                               | 1057                              | 1478                              | 1992                              | 2603                              | 3257                              | 3948                              |
| 0                         | Dry_550ppm       | 2716                              | 2716                              | 2716                              | 2716                              | 2716                              | 2716                              | 2716                              | 2716                              | 2716                              | 2716                              | 2716                              |
| 25                        | Dry_550ppm       | 2716                              | 2716                              | 2716                              | 2716                              | 2716                              | 2716                              | 2716                              | 2716                              | 2716                              | 2716                              | 2716                              |
| 40                        | Dry_550ppm       | 2280                              | 2320                              | 2364                              | 2408                              | 2455                              | 2501                              | 2547                              | 2588                              | 2637                              | 2674                              | 2716                              |
| 50                        | Dry_550ppm       | 2097                              | 2129                              | 2180                              | 2221                              | 2280                              | 2350                              | 2424                              | 2501                              | 2575                              | 2650                              | 2716                              |
| 60                        | Dry_550ppm       | 1952                              | 1998                              | 2045                              | 2105                              | 2160                              | 2221                              | 2306                              | 2408                              | 2514                              | 2622                              | 2716                              |
| 70                        | Dry_550ppm       | 1620                              | 1840                              | 1938                              | 1998                              | 2063                              | 2129                              | 2210                              | 2320                              | 2455                              | 2588                              | 2716                              |
| 80                        | Dry_550ppm       | 1165                              | 1402                              | 1672                              | 1900                              | 1979                              | 2054                              | 2139                              | 2242                              | 2392                              | 2561                              | 2716                              |
| 90                        | Dry_550ppm       | 818                               | 1032                              | 1290                              | 1594                              | 1886                              | 1986                              | 2081                              | 2190                              | 2334                              | 2531                              | 2716                              |
| 100                       | Dry_550ppm       | 564                               | 748                               | 980                               | 1268                              | 1620                              | 1920                              | 2016                              | 2129                              | 2280                              | 2501                              | 2716                              |
| 120                       | Dry_550ppm       | 246                               | 371                               | 543                               | 775                               | 1087                              | 1496                              | 1912                              | 2043                              | 2203                              | 2440                              | 2716                              |
| 0                         | Wet_550ppm       | 4700                              | 4700                              | 4700                              | 4700                              | 4700                              | 4700                              | 4700                              | 4700                              | 4700                              | 4700                              | 4700                              |
| 25                        | Wet_550ppm       | 4700                              | 4700                              | 4700                              | 4700                              | 4700                              | 4700                              | 4700                              | 4700                              | 4700                              | 4700                              | 4700                              |
| 40                        | Wet_550ppm       | 3568                              | 3680                              | 3786                              | 3895                              | 4007                              | 4121                              | 4236                              | 4352                              | 4466                              | 4582                              | 4700                              |
| 50                        | Wet_550ppm       | 2847                              | 3025                              | 3206                              | 3388                              | 3568                              | 3750                              | 3932                              | 4121                              | 4314                              | 4505                              | 4700                              |
| 60                        | Wet_550ppm       | 2188                              | 2406                              | 2639                              | 2883                              | 3134                              | 3388                              | 3642                              | 3895                              | 4159                              | 4428                              | 4700                              |
| 70                        | Wet_550ppm       | 1633                              | 1868                              | 2128                              | 2406                              | 2708                              | 3025                              | 3348                              | 3680                              | 4007                              | 4352                              | 4700                              |
| 80                        | Wet_550ppm       | 1172                              | 1413                              | 1685                              | 1982                              | 2311                              | 2674                              | 3061                              | 3458                              | 3859                              | 4275                              | 4700                              |
| 90                        | Wet_550ppm       | 821                               | 1037                              | 1298                              | 1607                              | 1953                              | 2341                              | 2779                              | 3241                              | 3715                              | 4198                              | 4700                              |
| 100                       | Wet_550ppm       | 568                               | 749                               | 983                               | 1277                              | 1633                              | 2040                              | 2505                              | 3025                              | 3568                              | 4121                              | 4700                              |
| 120                       | Wet_550ppm       | 254                               | 378                               | 548                               | 777                               | 1092                              | 1507                              | 2011                              | 2606                              | 3276                              | 3969                              | 4700                              |



**Table S8: NWheat simulated yield (kg ha<sup>-1</sup>) for sensitivity analysis of FOZ<sub>1</sub> values (SFOZ<sub>1</sub> = 0.0) for 1993 FACE experiment at Maricopa, AZ, USA. “Dry” treatment = low irrigation and “Wet” treatment = high irrigation. CO<sub>2</sub> was either a constant 350 ppm or 550 ppm. All treatments used cv. Yecora.**

| M7 Ozone (ppb) | Treatment  | FOZ <sub>1</sub> = 1.0 | FOZ <sub>1</sub> = 0.9 | FOZ <sub>1</sub> = 0.8 | FOZ <sub>1</sub> = 0.7 | FOZ <sub>1</sub> = 0.6 | FOZ <sub>1</sub> = 0.5 | FOZ <sub>1</sub> = 0.4 | FOZ <sub>1</sub> = 0.3 | FOZ <sub>1</sub> = 0.2 | FOZ <sub>1</sub> = 0.1 | FOZ <sub>1</sub> = 0.0 |
|----------------|------------|------------------------|------------------------|------------------------|------------------------|------------------------|------------------------|------------------------|------------------------|------------------------|------------------------|------------------------|
| 0              | Dry_350ppm | 7088                   | 7088                   | 7088                   | 7088                   | 7088                   | 7088                   | 7088                   | 7088                   | 7088                   | 7088                   | 7088                   |
| 25             | Dry_350ppm | 7088                   | 7088                   | 7088                   | 7088                   | 7088                   | 7088                   | 7088                   | 7088                   | 7088                   | 7088                   | 7088                   |
| 40             | Dry_350ppm | 6612                   | 6759                   | 6881                   | 6971                   | 7018                   | 7044                   | 7056                   | 7071                   | 7076                   | 7085                   | 7088                   |
| 50             | Dry_350ppm | 5599                   | 5860                   | 6118                   | 6367                   | 6612                   | 6845                   | 6989                   | 7044                   | 7067                   | 7079                   | 7088                   |
| 60             | Dry_350ppm | 4467                   | 4873                   | 5272                   | 5652                   | 6016                   | 6367                   | 6710                   | 6971                   | 7048                   | 7077                   | 7088                   |
| 70             | Dry_350ppm | 3275                   | 3822                   | 4350                   | 4873                   | 5382                   | 5860                   | 6318                   | 6759                   | 7018                   | 7071                   | 7088                   |
| 80             | Dry_350ppm | 1760                   | 2617                   | 3399                   | 4059                   | 4700                   | 5327                   | 5912                   | 6466                   | 6945                   | 7063                   | 7088                   |
| 90             | Dry_350ppm | 626                    | 1286                   | 2216                   | 3211                   | 3999                   | 4758                   | 5492                   | 6170                   | 6804                   | 7050                   | 7088                   |
| 100            | Dry_350ppm | 154                    | 455                    | 1107                   | 2138                   | 3275                   | 4176                   | 5046                   | 5860                   | 6612                   | 7044                   | 7088                   |
| 120            | Dry_350ppm | 7                      | 25                     | 131                    | 518                    | 1480                   | 2934                   | 4118                   | 5215                   | 6220                   | 7012                   | 7088                   |
| 0              | Wet_350ppm | 8281                   | 8281                   | 8281                   | 8281                   | 8281                   | 8281                   | 8281                   | 8281                   | 8281                   | 8281                   | 8281                   |
| 25             | Wet_350ppm | 8281                   | 8281                   | 8281                   | 8281                   | 8281                   | 8281                   | 8281                   | 8281                   | 8281                   | 8281                   | 8281                   |
| 40             | Wet_350ppm | 6725                   | 6883                   | 7041                   | 7198                   | 7355                   | 7511                   | 7667                   | 7823                   | 7977                   | 8129                   | 8281                   |
| 50             | Wet_350ppm | 5650                   | 5924                   | 6194                   | 6461                   | 6725                   | 6988                   | 7250                   | 7511                   | 7771                   | 8028                   | 8281                   |
| 60             | Wet_350ppm | 4489                   | 4899                   | 5309                   | 5706                   | 6086                   | 6461                   | 6830                   | 7198                   | 7563                   | 7926                   | 8281                   |
| 70             | Wet_350ppm | 3300                   | 3846                   | 4373                   | 4899                   | 5422                   | 5924                   | 6408                   | 6883                   | 7355                   | 7823                   | 8281                   |
| 80             | Wet_350ppm | 1780                   | 2640                   | 3423                   | 4083                   | 4723                   | 5366                   | 5978                   | 6567                   | 7146                   | 7719                   | 8281                   |
| 90             | Wet_350ppm | 639                    | 1302                   | 2238                   | 3236                   | 4024                   | 4782                   | 5536                   | 6247                   | 6936                   | 7615                   | 8281                   |
| 100            | Wet_350ppm | 157                    | 465                    | 1122                   | 2159                   | 3300                   | 4200                   | 5074                   | 5924                   | 6725                   | 7511                   | 8281                   |
| 120            | Wet_350ppm | 7                      | 26                     | 134                    | 529                    | 1498                   | 2958                   | 4142                   | 5250                   | 6301                   | 7303                   | 8281                   |
| 0              | Dry_550ppm | 8737                   | 8737                   | 8737                   | 8737                   | 8737                   | 8737                   | 8737                   | 8737                   | 8737                   | 8737                   | 8737                   |
| 25             | Dry_550ppm | 8737                   | 8737                   | 8737                   | 8737                   | 8737                   | 8737                   | 8737                   | 8737                   | 8737                   | 8737                   | 8737                   |
| 40             | Dry_550ppm | 8594                   | 8663                   | 8710                   | 8735                   | 8737                   | 8737                   | 8737                   | 8737                   | 8737                   | 8737                   | 8737                   |
| 50             | Dry_550ppm | 7525                   | 7824                   | 8111                   | 8386                   | 8594                   | 8698                   | 8737                   | 8737                   | 8737                   | 8737                   | 8737                   |
| 60             | Dry_550ppm | 6259                   | 6713                   | 7157                   | 7585                   | 7996                   | 8386                   | 8645                   | 8735                   | 8737                   | 8737                   | 8737                   |
| 70             | Dry_550ppm | 4860                   | 5515                   | 6128                   | 6713                   | 7282                   | 7824                   | 8332                   | 8663                   | 8737                   | 8737                   | 8737                   |
| 80             | Dry_550ppm | 3384                   | 4202                   | 5006                   | 5793                   | 6520                   | 7220                   | 7881                   | 8484                   | 8728                   | 8737                   | 8737                   |
| 90             | Dry_550ppm | 1553                   | 2794                   | 3834                   | 4787                   | 5725                   | 6585                   | 7404                   | 8166                   | 8681                   | 8737                   | 8737                   |
| 100            | Dry_550ppm | 378                    | 1158                   | 2491                   | 3760                   | 4860                   | 5927                   | 6904                   | 7824                   | 8594                   | 8737                   | 8737                   |
| 120            | Dry_550ppm | 7                      | 48                     | 318                    | 1308                   | 3067                   | 4493                   | 5860                   | 7094                   | 8221                   | 8737                   | 8737                   |
| 0              | Wet_550ppm | 9425                   | 9425                   | 9425                   | 9425                   | 9425                   | 9425                   | 9425                   | 9425                   | 9425                   | 9425                   | 9425                   |
| 25             | Wet_550ppm | 9425                   | 9425                   | 9425                   | 9425                   | 9425                   | 9425                   | 9425                   | 9425                   | 9425                   | 9425                   | 9425                   |
| 40             | Wet_550ppm | 8864                   | 9048                   | 9229                   | 9410                   | 9425                   | 9425                   | 9425                   | 9425                   | 9425                   | 9425                   | 9425                   |
| 50             | Wet_550ppm | 7604                   | 7925                   | 8241                   | 8554                   | 8864                   | 9169                   | 9425                   | 9425                   | 9425                   | 9425                   | 9425                   |
| 60             | Wet_550ppm | 6288                   | 6755                   | 7215                   | 7668                   | 8116                   | 8554                   | 8987                   | 9410                   | 9425                   | 9425                   | 9425                   |
| 70             | Wet_550ppm | 4882                   | 5533                   | 6153                   | 6755                   | 7345                   | 7925                   | 8492                   | 9048                   | 9425                   | 9425                   | 9425                   |
| 80             | Wet_550ppm | 3410                   | 4228                   | 5028                   | 5813                   | 6556                   | 7280                   | 7989                   | 8678                   | 9350                   | 9425                   | 9425                   |
| 90             | Wet_550ppm | 1572                   | 2817                   | 3861                   | 4810                   | 5744                   | 6623                   | 7475                   | 8304                   | 9109                   | 9425                   | 9425                   |
| 100            | Wet_550ppm | 386                    | 1173                   | 2514                   | 3786                   | 4882                   | 5949                   | 6953                   | 7925                   | 8864                   | 9425                   | 9425                   |
| 120            | Wet_550ppm | 8                      | 49                     | 325                    | 1325                   | 3091                   | 4518                   | 5881                   | 7150                   | 8367                   | 9425                   | 9425                   |

**Table S9: NWheat simulated yield (kg ha<sup>-1</sup>) for sensitivity analysis of SFOZ<sub>1</sub> values (FOZ<sub>1</sub> = 0.0) for 1993 FACE experiment at Maricopa, AZ, USA. “Dry” treatment = low irrigation and “Wet” treatment = high irrigation. CO<sub>2</sub> was either a constant 350 ppm or 550 ppm. All treatments used cv. Yecora.**

| <b>M7 Ozone<br/>(ppb)</b> | <b>Treatment</b> | <b>SFOZ<sub>1</sub> =<br/>1.0</b> | <b>SFOZ<sub>1</sub> =<br/>0.9</b> | <b>SFOZ<sub>1</sub> =<br/>0.8</b> | <b>SFOZ<sub>1</sub> =<br/>0.7</b> | <b>SFOZ<sub>1</sub> =<br/>0.6</b> | <b>SFOZ<sub>1</sub> =<br/>0.5</b> | <b>SFOZ<sub>1</sub> =<br/>0.4</b> | <b>SFOZ<sub>1</sub> =<br/>0.3</b> | <b>SFOZ<sub>1</sub> =<br/>0.2</b> | <b>SFOZ<sub>1</sub> =<br/>0.1</b> | <b>SFOZ<sub>1</sub> =<br/>0.0</b> |
|---------------------------|------------------|-----------------------------------|-----------------------------------|-----------------------------------|-----------------------------------|-----------------------------------|-----------------------------------|-----------------------------------|-----------------------------------|-----------------------------------|-----------------------------------|-----------------------------------|
| 0                         | Dry_350ppm       | 7088                              | 7088                              | 7088                              | 7088                              | 7088                              | 7088                              | 7088                              | 7088                              | 7088                              | 7088                              | 7088                              |
| 25                        | Dry_350ppm       | 7088                              | 7088                              | 7088                              | 7088                              | 7088                              | 7088                              | 7088                              | 7088                              | 7088                              | 7088                              | 7088                              |
| 40                        | Dry_350ppm       | 5098                              | 5293                              | 5499                              | 5717                              | 5949                              | 6190                              | 6424                              | 6623                              | 6797                              | 6954                              | 7088                              |
| 50                        | Dry_350ppm       | 4070                              | 4295                              | 4546                              | 4809                              | 5098                              | 5427                              | 5795                              | 6190                              | 6559                              | 6852                              | 7088                              |
| 60                        | Dry_350ppm       | 3238                              | 3526                              | 3814                              | 4113                              | 4447                              | 4809                              | 5227                              | 5717                              | 6274                              | 6742                              | 7088                              |
| 70                        | Dry_350ppm       | 2452                              | 2799                              | 3159                              | 3526                              | 3899                              | 4295                              | 4755                              | 5293                              | 5949                              | 6623                              | 7088                              |
| 80                        | Dry_350ppm       | 1766                              | 2127                              | 2528                              | 2961                              | 3399                              | 3857                              | 4345                              | 4920                              | 5640                              | 6492                              | 7088                              |
| 90                        | Dry_350ppm       | 522                               | 1555                              | 1959                              | 2415                              | 2921                              | 3443                              | 3985                              | 4598                              | 5357                              | 6352                              | 7088                              |
| 100                       | Dry_350ppm       | 488                               | 514                               | 1470                              | 1926                              | 2452                              | 3041                              | 3650                              | 4295                              | 5098                              | 6190                              | 7088                              |
| 120                       | Dry_350ppm       | 421                               | 452                               | 484                               | 517                               | 1646                              | 2267                              | 3001                              | 3773                              | 4647                              | 5871                              | 7088                              |
| 0                         | Wet_350ppm       | 8281                              | 8281                              | 8281                              | 8281                              | 8281                              | 8281                              | 8281                              | 8281                              | 8281                              | 8281                              | 8281                              |
| 25                        | Wet_350ppm       | 8281                              | 8281                              | 8281                              | 8281                              | 8281                              | 8281                              | 8281                              | 8281                              | 8281                              | 8281                              | 8281                              |
| 40                        | Wet_350ppm       | 5632                              | 5830                              | 6040                              | 6263                              | 6496                              | 6744                              | 7007                              | 7281                              | 7570                              | 7893                              | 8281                              |
| 50                        | Wet_350ppm       | 4599                              | 4828                              | 5073                              | 5338                              | 5632                              | 5967                              | 6341                              | 6744                              | 7193                              | 7670                              | 8281                              |
| 60                        | Wet_350ppm       | 3737                              | 4038                              | 4336                              | 4642                              | 4972                              | 5338                              | 5764                              | 6263                              | 6835                              | 7470                              | 8281                              |
| 70                        | Wet_350ppm       | 2883                              | 3266                              | 3652                              | 4038                              | 4424                              | 4828                              | 5283                              | 5830                              | 6496                              | 7281                              | 8281                              |
| 80                        | Wet_350ppm       | 2061                              | 2505                              | 2967                              | 3438                              | 3908                              | 4380                              | 4875                              | 5451                              | 6183                              | 7102                              | 8281                              |
| 90                        | Wet_350ppm       | 573                               | 1793                              | 2299                              | 2841                              | 3395                              | 3952                              | 4512                              | 5124                              | 5896                              | 6923                              | 8281                              |
| 100                       | Wet_350ppm       | 535                               | 563                               | 1683                              | 2259                              | 2883                              | 3524                              | 4167                              | 4828                              | 5632                              | 6744                              | 8281                              |
| 120                       | Wet_350ppm       | 461                               | 496                               | 531                               | 567                               | 1906                              | 2672                              | 3481                              | 4294                              | 5173                              | 6418                              | 8281                              |
| 0                         | Dry_550ppm       | 8737                              | 8737                              | 8737                              | 8737                              | 8737                              | 8737                              | 8737                              | 8737                              | 8737                              | 8737                              | 8737                              |
| 25                        | Dry_550ppm       | 8737                              | 8737                              | 8737                              | 8737                              | 8737                              | 8737                              | 8737                              | 8737                              | 8737                              | 8737                              | 8737                              |
| 40                        | Dry_550ppm       | 6144                              | 6365                              | 6599                              | 6847                              | 7108                              | 7385                              | 7680                              | 7981                              | 8258                              | 8504                              | 8737                              |
| 50                        | Dry_550ppm       | 4994                              | 5249                              | 5522                              | 5816                              | 6144                              | 6517                              | 6934                              | 7385                              | 7886                              | 8338                              | 8737                              |
| 60                        | Dry_550ppm       | 4040                              | 4372                              | 4701                              | 5042                              | 5409                              | 5816                              | 6290                              | 6847                              | 7486                              | 8169                              | 8737                              |
| 70                        | Dry_550ppm       | 3092                              | 3520                              | 3946                              | 4372                              | 4799                              | 5249                              | 5755                              | 6365                              | 7108                              | 7981                              | 8737                              |
| 80                        | Dry_550ppm       | 2199                              | 2676                              | 3187                              | 3712                              | 4228                              | 4750                              | 5300                              | 5942                              | 6758                              | 7785                              | 8737                              |
| 90                        | Dry_550ppm       | 619                               | 1917                              | 2455                              | 3045                              | 3665                              | 4276                              | 4897                              | 5577                              | 6438                              | 7585                              | 8737                              |
| 100                       | Dry_550ppm       | 576                               | 608                               | 1801                              | 2412                              | 3092                              | 3806                              | 4514                              | 5249                              | 6144                              | 7385                              | 8737                              |
| 120                       | Dry_550ppm       | 494                               | 533                               | 572                               | 613                               | 2036                              | 2857                              | 3759                              | 4655                              | 5633                              | 7020                              | 8737                              |
| 0                         | Wet_550ppm       | 9425                              | 9425                              | 9425                              | 9425                              | 9425                              | 9425                              | 9425                              | 9425                              | 9425                              | 9425                              | 9425                              |
| 25                        | Wet_550ppm       | 9425                              | 9425                              | 9425                              | 9425                              | 9425                              | 9425                              | 9425                              | 9425                              | 9425                              | 9425                              | 9425                              |
| 40                        | Wet_550ppm       | 6481                              | 6702                              | 6938                              | 7186                              | 7446                              | 7723                              | 8015                              | 8315                              | 8634                              | 8992                              | 9425                              |
| 50                        | Wet_550ppm       | 5337                              | 5589                              | 5860                              | 6154                              | 6481                              | 6856                              | 7273                              | 7723                              | 8219                              | 8745                              | 9425                              |
| 60                        | Wet_550ppm       | 4378                              | 4717                              | 5046                              | 5384                              | 5749                              | 6154                              | 6628                              | 7186                              | 7824                              | 8524                              | 9425                              |
| 70                        | Wet_550ppm       | 3405                              | 3844                              | 4283                              | 4717                              | 5144                              | 5589                              | 6092                              | 6702                              | 7446                              | 8315                              | 9425                              |
| 80                        | Wet_550ppm       | 2441                              | 2965                              | 3502                              | 4041                              | 4571                              | 5095                              | 5641                              | 6280                              | 7096                              | 8119                              | 9425                              |
| 90                        | Wet_550ppm       | 658                               | 2122                              | 2723                              | 3356                              | 3992                              | 4620                              | 5241                              | 5915                              | 6775                              | 7922                              | 9425                              |
| 100                       | Wet_550ppm       | 615                               | 647                               | 1989                              | 2676                              | 3405                              | 4138                              | 4860                              | 5589                              | 6481                              | 7723                              | 9425                              |
| 120                       | Wet_550ppm       | 530                               | 570                               | 610                               | 652                               | 2257                              | 3160                              | 4090                              | 5000                              | 5970                              | 7358                              | 9425                              |



**Table S10: Slope, y-intercept, and O<sub>3</sub> sensitivity for each cultivar determined from the linear regression of the O<sub>3</sub> exposure-yield response data (scaled to 25 ppb M7 O<sub>3</sub>) for maize, rice, soybean, and wheat (Fig. S2, S3). The data consists of the cultivars examined in the Mills et al. (2018) literature review combined with the maize and soybean cultivars used in this study for a total of 9 maize cultivars, 50 rice cultivars, 49 soybean cultivars, and 23 wheat cultivars.**

| Crop  | Cultivar        | Intercept | Slope  | O <sub>3</sub> Sensitivity | Literature References                                                                                                                                         |
|-------|-----------------|-----------|--------|----------------------------|---------------------------------------------------------------------------------------------------------------------------------------------------------------|
| Maize | B73xHp301       | 113.0     | -0.520 | Sensitive                  | (Choquette et al., 2020)                                                                                                                                      |
| Maize | B73xMo17        | 106.8     | -0.272 | Intermediate               | (Choquette et al., 2020)                                                                                                                                      |
| Maize | B73xNC338       | 122.4     | -0.898 | Sensitive                  | (Choquette et al., 2020)                                                                                                                                      |
| Maize | Mo17xHp301      | 103.7     | -0.149 | Tolerant                   | (Choquette et al., 2020)                                                                                                                                      |
| Maize | Mo17xNC338      | 117.5     | -0.700 | Sensitive                  | (Choquette et al., 2020)                                                                                                                                      |
| Maize | NC338xHp301     | 103.4     | -0.134 | Tolerant                   | (Choquette et al., 2020)                                                                                                                                      |
| Maize | PAG 397         | 106.2     | -0.248 | Tolerant                   | (Kress and Miller, 1985)                                                                                                                                      |
| Maize | Pioneer 3714    | 106.2     | -0.253 | Intermediate               | (Mulchi et al., 1995; Rudorff et al., 1996)                                                                                                                   |
| Maize | Pioneer 3780    | 108.8     | -0.339 | Intermediate               | (Kress and Miller, 1985; Mckee, 1993)                                                                                                                         |
| Rice  | Akitakomachi    | 101.3     | -0.051 | Tolerant                   | (Sawada and Kohno, 2009)                                                                                                                                      |
| Rice  | Basmati-370     | 116.0     | -0.638 | Sensitive                  | (Wahid et al., 2011)                                                                                                                                          |
| Rice  | Basmati-Pak     | 112.7     | -0.506 | Sensitive                  | (Wahid et al., 2011)                                                                                                                                          |
| Rice  | BR11            | 114.9     | -0.597 | Sensitive                  | (Akhtar et al., 2010b)                                                                                                                                        |
| Rice  | BR14            | 106.3     | -0.253 | Intermediate               | (Akhtar et al., 2010b)                                                                                                                                        |
| Rice  | BR28            | 110.9     | -0.437 | Sensitive                  | (Akhtar et al., 2010b)                                                                                                                                        |
| Rice  | BR29            | 107.7     | -0.310 | Intermediate               | (Akhtar et al., 2010b)                                                                                                                                        |
| Rice  | Bt-SY63         | 153.3     | -2.133 | Sensitive                  | (Li et al., 2017)                                                                                                                                             |
| Rice  | Fan 3694        | 109.7     | -0.398 | Sensitive                  | (Zheng et al., 2013)                                                                                                                                          |
| Rice  | Gorkor 15       | 108.1     | -0.323 | Intermediate               | (Ariyaphanphitak et al., 2005)                                                                                                                                |
| Rice  | Habataki        | 105.9     | -0.260 | Intermediate               | (Tsukahara et al., 2015)                                                                                                                                      |
| Rice  | Haenuki         | 100.0     | 0.002  | Tolerant                   | (Sawada and Kohno, 2009)                                                                                                                                      |
| Rice  | Hitomebore      | 101.3     | -0.051 | Tolerant                   | (Sawada and Kohno, 2009)                                                                                                                                      |
| Rice  | IR 36           | 109.9     | -0.395 | Sensitive                  | (Sawada and Kohno, 2009)                                                                                                                                      |
| Rice  | IR64            | 103.0     | -0.115 | Tolerant                   | (Sawada and Kohno, 2009; Frei et al., 2012)                                                                                                                   |
| Rice  | IRRI-9          | 116.0     | -0.642 | Sensitive                  | (Wahid et al., 2011)                                                                                                                                          |
| Rice  | Jothi           | 98.7      | 0.053  | Tolerant                   | (Sawada and Kohno, 2009)                                                                                                                                      |
| Rice  | Kasalath        | 105.2     | -0.193 | Intermediate               | (Sawada and Kohno, 2009; Frei et al., 2012; Sawada et al., 2016)                                                                                              |
| Rice  | Khowdokmali 105 | 104.5     | -0.180 | Intermediate               | (Ariyaphanphitak et al., 2005)                                                                                                                                |
| Rice  | Kinuhjkari      | 111.8     | -0.474 | Sensitive                  | (Yamaguchi et al., 2008)                                                                                                                                      |
| Rice  | Kirara 397      | 108.4     | -0.350 | Intermediate               | (Sawada and Kohno, 2009; Frei et al., 2012; Sawada et al., 2012)                                                                                              |
| Rice  | Klongluang 1    | 104.6     | -0.185 | Intermediate               | (Ariyaphanphitak et al., 2005)                                                                                                                                |
| Rice  | Koshihikari     | 103.2     | -0.160 | Tolerant                   | (Kobayashi et al., 1995; Yamaguchi et al., 2008; Sawada and Kohno, 2009; Frei et al., 2012; Sawada et al., 2012; Yamaguchi et al., 2014; Sawada et al., 2016) |
| Rice  | KRH-2           | 96.3      | 0.147  | Tolerant                   | (Sawada and Kohno, 2009)                                                                                                                                      |
| Rice  | LYPJ            | 119.7     | -0.787 | Sensitive                  | (Shi et al., 2009)                                                                                                                                            |
| Rice  | M7              | 102.2     | -0.087 | Tolerant                   | (Kats et al., 1985)                                                                                                                                           |
| Rice  | M9              | 105.6     | -0.224 | Intermediate               | (Kats et al., 1985)                                                                                                                                           |
| Rice  | Malviya dhan 36 | 110.8     | -0.430 | Sensitive                  | (Sarkar et al., 2015)                                                                                                                                         |
| Rice  | Massigura       | 98.4      | 0.063  | Tolerant                   | (Sawada and Kohno, 2009)                                                                                                                                      |
| Rice  | MR185           | 109.3     | -0.371 | Intermediate               | (Ishii et al., 2004)                                                                                                                                          |
| Rice  | MR84            | 104.5     | -0.181 | Intermediate               | (Ishii et al., 2004)                                                                                                                                          |
| Rice  | NDR 97          | 112.1     | -0.485 | Sensitive                  | (Rai and Agrawal, 2008)                                                                                                                                       |
| Rice  | Nipponbare      | 99.6      | -0.005 | Tolerant                   | (Kobayashi et al., 1995; Sawada and Kohno, 2009; Frei et al., 2012)                                                                                           |
| Rice  | Pathumthani 1   | 114.4     | -0.574 | Sensitive                  | (Ariyaphanphitak et al., 2005)                                                                                                                                |
| Rice  | S-210           | 104.3     | -0.173 | Intermediate               | (Kats et al., 1985)                                                                                                                                           |
| Rice  | Sasanishiki     | 102.5     | -0.083 | Tolerant                   | (Sawada and Kohno, 2009; Tsukahara et al., 2015)                                                                                                              |
| Rice  | Sato-no-yuki    | 102.6     | -0.105 | Tolerant                   | (Sawada and Kohno, 2009)                                                                                                                                      |
| Rice  | Saurabh 950     | 108.9     | -0.358 | Intermediate               | (Rai and Agrawal, 2008)                                                                                                                                       |
| Rice  | Shivani         | 113.0     | -0.519 | Sensitive                  | (Sarkar et al., 2015)                                                                                                                                         |

|         |                 |       |        |              |                                                                                                                                                                                         |
|---------|-----------------|-------|--------|--------------|-----------------------------------------------------------------------------------------------------------------------------------------------------------------------------------------|
| Rice    | SL41            | 100.7 | -0.028 | Tolerant     | (Frei et al., 2012)                                                                                                                                                                     |
| Rice    | Suphanburi 1    | 105.0 | -0.199 | Intermediate | (Sawada and Kohno, 2009)                                                                                                                                                                |
| Rice    | Suphanburi 90   | 102.6 | -0.105 | Tolerant     | (Sawada and Kohno, 2009)                                                                                                                                                                |
| Rice    | SY63            | 119.8 | -1.192 | Sensitive    | (Pang et al., 2009; Shi et al., 2009; Li et al., 2017)                                                                                                                                  |
| Rice    | Takanari        | 105.1 | -0.210 | Intermediate | (Sawada and Kohno, 2009; Sawada et al., 2012)                                                                                                                                           |
| Rice    | Tsugaru Reman   | 101.5 | -0.061 | Tolerant     | (Sawada and Kohno, 2009)                                                                                                                                                                |
| Rice    | WJ15            | 115.7 | -0.626 | Sensitive    | (Shi et al., 2009)                                                                                                                                                                      |
| Rice    | WYJ3            | 113.9 | -0.555 | Sensitive    | (Pang et al., 2009)                                                                                                                                                                     |
| Rice    | YD6             | 109.8 | -0.391 | Intermediate | (Shi et al., 2009)                                                                                                                                                                      |
| Rice    | Yumehitachi     | 98.7  | 0.053  | Tolerant     | (Sawada and Kohno, 2009)                                                                                                                                                                |
| Rice    | Yumetsukushi    | 101.3 | -0.051 | Tolerant     | (Sawada and Kohno, 2009)                                                                                                                                                                |
| Soybean | 93B15           | 110.6 | -0.702 | Intermediate | (Morgan et al., 2006; Betzelberger et al., 2012)                                                                                                                                        |
| Soybean | A3127           | 112.9 | -0.515 | Intermediate | (Betzelberger et al., 2010)                                                                                                                                                             |
| Soybean | Amsoy-71        | 113.1 | -0.525 | Intermediate | (Kress et al., 1986)                                                                                                                                                                    |
| Soybean | Bay             | 102.0 | -0.079 | Tolerant     | (Mulchi et al., 1988)                                                                                                                                                                   |
| Soybean | Beeson          | 108.2 | -0.327 | Tolerant     | (Troiano et al., 1983)                                                                                                                                                                  |
| Soybean | Bragg           | 104.4 | -0.235 | Tolerant     | (Heagle and Letchworth, 1982; Heagle et al., 1991; Singh et al., 2010)                                                                                                                  |
| Soybean | Calland         | 109.6 | -0.384 | Tolerant     | (Mulchi et al., 1988)                                                                                                                                                                   |
| Soybean | Clark           | 115.0 | -0.578 | Intermediate | (Mulchi et al., 1995; Betzelberger et al., 2010)                                                                                                                                        |
| Soybean | Coker (NK) 6955 | 99.1  | 0.036  | Tolerant     | (Heagle et al., 1998)                                                                                                                                                                   |
| Soybean | Coker (NK) 9655 | 115.7 | -0.639 | Intermediate | (Miller et al., 1994)                                                                                                                                                                   |
| Soybean | Corsoy          | 113.9 | -0.555 | Intermediate | (Kress and Miller, 1983)                                                                                                                                                                |
| Soybean | Corsoy-79       | 113.9 | -0.564 | Intermediate | (Kress et al., 1986; Heggstad et al., 1988)                                                                                                                                             |
| Soybean | Cumberland      | 79.7  | 0.813  | Tolerant     | (Mulchi et al., 1988)                                                                                                                                                                   |
| Soybean | Davis           | 112.4 | -0.506 | Tolerant     | (Heagle and Letchworth, 1982; Heagle et al., 1983a; Heagle et al., 1983b; Heagle et al., 1986; Heagle et al., 1987; Heagle et al., 1991)                                                |
| Soybean | Dwight          | 113.4 | -0.643 | Intermediate | (Betzelberger et al., 2010; Betzelberger et al., 2012)                                                                                                                                  |
| Soybean | Essex           | 113.9 | -0.527 | Intermediate | (Mulchi et al., 1988; Heggstad and Lesser, 1990; Miller et al., 1994; Fiscus et al., 1997; Heagle et al., 1998; Chernikova et al., 2000; Robinson and Britz, 2000; Booker et al., 2005) |
| Soybean | Forrest         | 112.1 | -0.500 | Tolerant     | (Heagle and Letchworth, 1982; Heggstad et al., 1985; Mulchi et al., 1988; Heggstad and Lesser, 1990; Heagle et al., 1991; Chernikova et al., 2000; Robinson and Britz, 2000)            |
| Soybean | HF25            | 126.2 | -1.047 | Sensitive    | (Zhang et al., 2014)                                                                                                                                                                    |
| Soybean | HF35            | 121.8 | -0.872 | Sensitive    | (Zhang et al., 2014)                                                                                                                                                                    |
| Soybean | HF55            | 121.7 | -0.866 | Sensitive    | (Zhang et al., 2014)                                                                                                                                                                    |
| Soybean | HN35            | 131.3 | -1.253 | Sensitive    | (Zhang et al., 2014)                                                                                                                                                                    |
| Soybean | HN37            | 126.4 | -1.055 | Sensitive    | (Zhang et al., 2014)                                                                                                                                                                    |
| Soybean | HN65            | 128.2 | -1.128 | Sensitive    | (Zhang et al., 2014)                                                                                                                                                                    |
| Soybean | Hodgson         | 110.5 | -0.419 | Tolerant     | (Kohut et al., 1986)                                                                                                                                                                    |
| Soybean | Holladay        | 115.8 | -0.633 | Intermediate | (Heagle et al., 1998)                                                                                                                                                                   |
| Soybean | Holt            | 111.0 | -0.440 | Tolerant     | (Betzelberger et al., 2010)                                                                                                                                                             |
| Soybean | HS93-4118       | 119.3 | -0.772 | Sensitive    | (Betzelberger et al., 2010; Betzelberger et al., 2012)                                                                                                                                  |
| Soybean | IA-3010         | 112.1 | -0.611 | Intermediate | (Betzelberger et al., 2010; Betzelberger et al., 2012)                                                                                                                                  |
| Soybean | LN97-15076      | 120.8 | -0.750 | Intermediate | (Betzelberger et al., 2010; Betzelberger et al., 2012)                                                                                                                                  |
| Soybean | Loda            | 117.4 | -0.817 | Sensitive    | (Betzelberger et al., 2010; Betzelberger et al., 2012)                                                                                                                                  |
| Soybean | Miles           | 104.6 | -0.185 | Tolerant     | (Mulchi et al., 1988)                                                                                                                                                                   |
| Soybean | NE3399          | 116.3 | -0.652 | Intermediate | (Betzelberger et al., 2010)                                                                                                                                                             |
| Soybean | Pana            | 117.3 | -0.789 | Sensitive    | (Betzelberger et al., 2010; Betzelberger et al., 2012)                                                                                                                                  |
| Soybean | Pella           | 100.2 | -0.007 | Tolerant     | (Mulchi et al., 1988)                                                                                                                                                                   |

|         |             |       |        |              |                                                                           |
|---------|-------------|-------|--------|--------------|---------------------------------------------------------------------------|
| Soybean | PK 472      | 119.4 | -0.777 | Sensitive    | (Singh et al., 2010)                                                      |
| Soybean | Pusa 9712   | 126.0 | -1.040 | Sensitive    | (Singh and Agrawal, 2011)                                                 |
| Soybean | Pusa 9814   | 130.2 | -1.207 | Sensitive    | (Singh and Agrawal, 2011)                                                 |
| Soybean | Ransom      | 109.6 | -0.392 | Tolerant     | (Heagle and Letchworth, 1982; Heagle et al., 1991)                        |
| Soybean | S 53-34     | 115.6 | -0.621 | Intermediate | (Miller et al., 1994)                                                     |
| Soybean | SN22        | 130.1 | -1.203 | Sensitive    | (Zhang et al., 2014)                                                      |
| Soybean | SN26        | 128.4 | -1.137 | Sensitive    | (Zhang et al., 2014)                                                      |
| Soybean | SN31        | 126.2 | -1.048 | Sensitive    | (Zhang et al., 2014)                                                      |
| Soybean | Sparks      | 109.6 | -0.383 | Tolerant     | (Mulchi et al., 1988)                                                     |
| Soybean | Union       | 126.3 | -1.053 | Sensitive    | (Mulchi et al., 1988)                                                     |
| Soybean | Ware        | 109.0 | -0.361 | Tolerant     | (Mulchi et al., 1988)                                                     |
| Soybean | Williams    | 119.3 | -0.772 | Intermediate | (Mulchi et al., 1988)                                                     |
| Soybean | Williams-79 | 112.9 | -0.533 | Intermediate | (Heggstad et al., 1985; Heggstad et al., 1988; Heggstad and Lesser, 1990) |
| Soybean | York        | 95.5  | 0.182  | Tolerant     | (Mulchi et al., 1988)                                                     |
| Soybean | Young       | 112.4 | -0.497 | Tolerant     | (Miller et al., 1989)                                                     |
| Wheat   | Albis       | 127.7 | -1.068 | Sensitive    | (Fuhrer et al., 1989; Fuhrer et al., 1992)                                |
| Wheat   | Astron      | 120.1 | -0.805 | Sensitive    | (Burkart et al., 2013)                                                    |
| Wheat   | Bijoy       | 114.4 | -0.575 | Intermediate | (Akhtar et al., 2010a)                                                    |
| Wheat   | Drabant     | 111.9 | -0.490 | Tolerant     | (Pleijel et al., 1991)                                                    |
| Wheat   | Dragon      | 121.7 | -0.872 | Sensitive    | (Gelang et al., 2000; Pleijel et al., 2006)                               |
| Wheat   | FH-7096     | 106.7 | -0.269 | Tolerant     | (Adrees et al., 2016)                                                     |
| Wheat   | FH-8203     | 107.6 | -0.303 | Tolerant     | (Adrees et al., 2016)                                                     |
| Wheat   | Inqilab-91  | 108.8 | -0.351 | Tolerant     | (Wahid, 2006)                                                             |
| Wheat   | Jia 002     | 113.5 | -0.541 | Intermediate | (Zheng et al., 2013)                                                      |
| Wheat   | Jia 403     | 110.2 | -0.408 | Tolerant     | (Feng et al., 2007)                                                       |
| Wheat   | Lantvete    | 111.2 | -0.449 | Tolerant     | (Pleijel et al., 2006)                                                    |
| Wheat   | Pasban-90   | 119.3 | -0.772 | Intermediate | (Wahid, 2006)                                                             |
| Wheat   | PBW 343     | 115.4 | -0.615 | Intermediate | (Tomer et al., 2015)                                                      |
| Wheat   | Pegassos    | 130.1 | -1.206 | Sensitive    | (Burkart et al., 2013)                                                    |
| Wheat   | Pelican     | 101.7 | -0.067 | Tolerant     | (De Temmerman et al., 1992)                                               |
| Wheat   | Perlo       | 118.6 | -0.750 | Intermediate | (Khan and Soja, 2003)                                                     |
| Wheat   | Punjab-96   | 117.6 | -0.705 | Intermediate | (Wahid, 2006)                                                             |
| Wheat   | Riband      | 106.6 | -0.265 | Tolerant     | (Ollerenshaw and Lyons, 1999)                                             |
| Wheat   | Sufi        | 112.6 | -0.505 | Intermediate | (Akhtar et al., 2010a)                                                    |
| Wheat   | Y15         | 128.2 | -1.100 | Sensitive    | (Zhu et al., 2011)                                                        |
| Wheat   | Y16         | 129.7 | -1.194 | Sensitive    | (Zhu et al., 2011)                                                        |
| Wheat   | Y19         | 136.3 | -1.365 | Sensitive    | (Zhu et al., 2011)                                                        |
| Wheat   | Y2          | 137.4 | -1.502 | Sensitive    | (Zhu et al., 2011)                                                        |

**Table S11: Weibull O<sub>3</sub> exposure-yield response equations for maize, rice, soybean, and wheat using the mean 7-hour (M7, 9:00 – 15:59 hr) O<sub>3</sub> index. For equations using the mean 12-hour (M12, 8:00 – 19:59 hr) O<sub>3</sub> index, the M12 O<sub>3</sub> input was converted from the M7 O<sub>3</sub> input using the relationship:  $M12 = (M7 * 0.86) - 1.66$  (Osborne et al., 2016). The relative yields for spring wheat and winter wheat were averaged to obtain the final relative yield for wheat.**

| <b>Crop</b> | <b>O<sub>3</sub> exposure-relative yield (RY) relationship</b>                                                                                               | <b>Reference</b>                             |
|-------------|--------------------------------------------------------------------------------------------------------------------------------------------------------------|----------------------------------------------|
| Maize       | $RY_{Weibull} = \exp[-(M12/124)^{2.83}]/\exp[-(20/124)^{2.83}]$                                                                                              | Adams et al. (1989);<br>Lesser et al. (1990) |
| Rice        | $RY_{Weibull} = \exp[-(M7/202)^{2.47}]/\exp[-(25/202)^{2.47}]$                                                                                               | Olszyk et al. (1988);<br>Adams et al. (1989) |
| Soybean     | $RY_{Weibull} = \exp[-(M12/107)^{1.58}]/\exp[-(20/107)^{1.58}]$                                                                                              | Adams et al. (1989);<br>Lesser et al. (1990) |
| Wheat       | $RY_{Weibull} = \exp[-(M7/137)^{2.34}]/\exp[-(25/137)^{2.34}]$ (Winter wheat)<br>$RY_{Weibull} = \exp[-(M7/186)^{3.2}]/\exp[-(25/186)^{3.2}]$ (Spring wheat) | Lesser et al. (1990)<br>Adams et al. (1989)  |

## Supplementary Figures

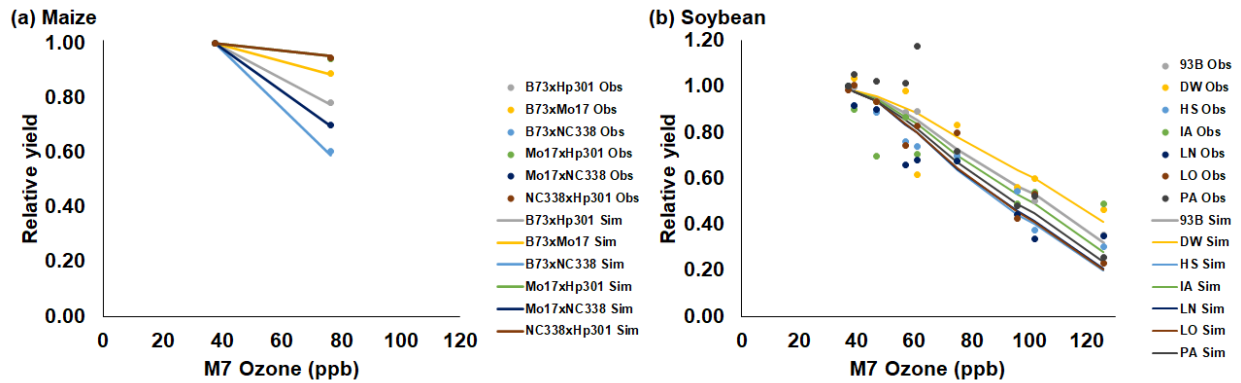

**Figure S1:** Observed (symbols) and simulated (lines) relative yield for increasing M7 O<sub>3</sub> concentrations for (a) six maize cultivars and (b) seven soybean cultivars. The maize data are from the 2018 FACE experiment conducted at Champaign, IL, USA consisting of two O<sub>3</sub> treatments (Choquette et al., 2020). The soybean data are from the 2009 SoyFACE experiment conducted at Champaign, IL, USA consisting of nine O<sub>3</sub> treatments (Betzelberger et al., 2012). The simulated data are from the DSSAT CERES-Maize and CROPGRO-Soybean models. The cultivar and O<sub>3</sub> parameters used for the simulations are shown in Tables 4 and 5. Relative yield is scaled to the ambient control treatment (Table 2). The statistical comparison between the observed and simulated data is shown in Figures 2 and 3.



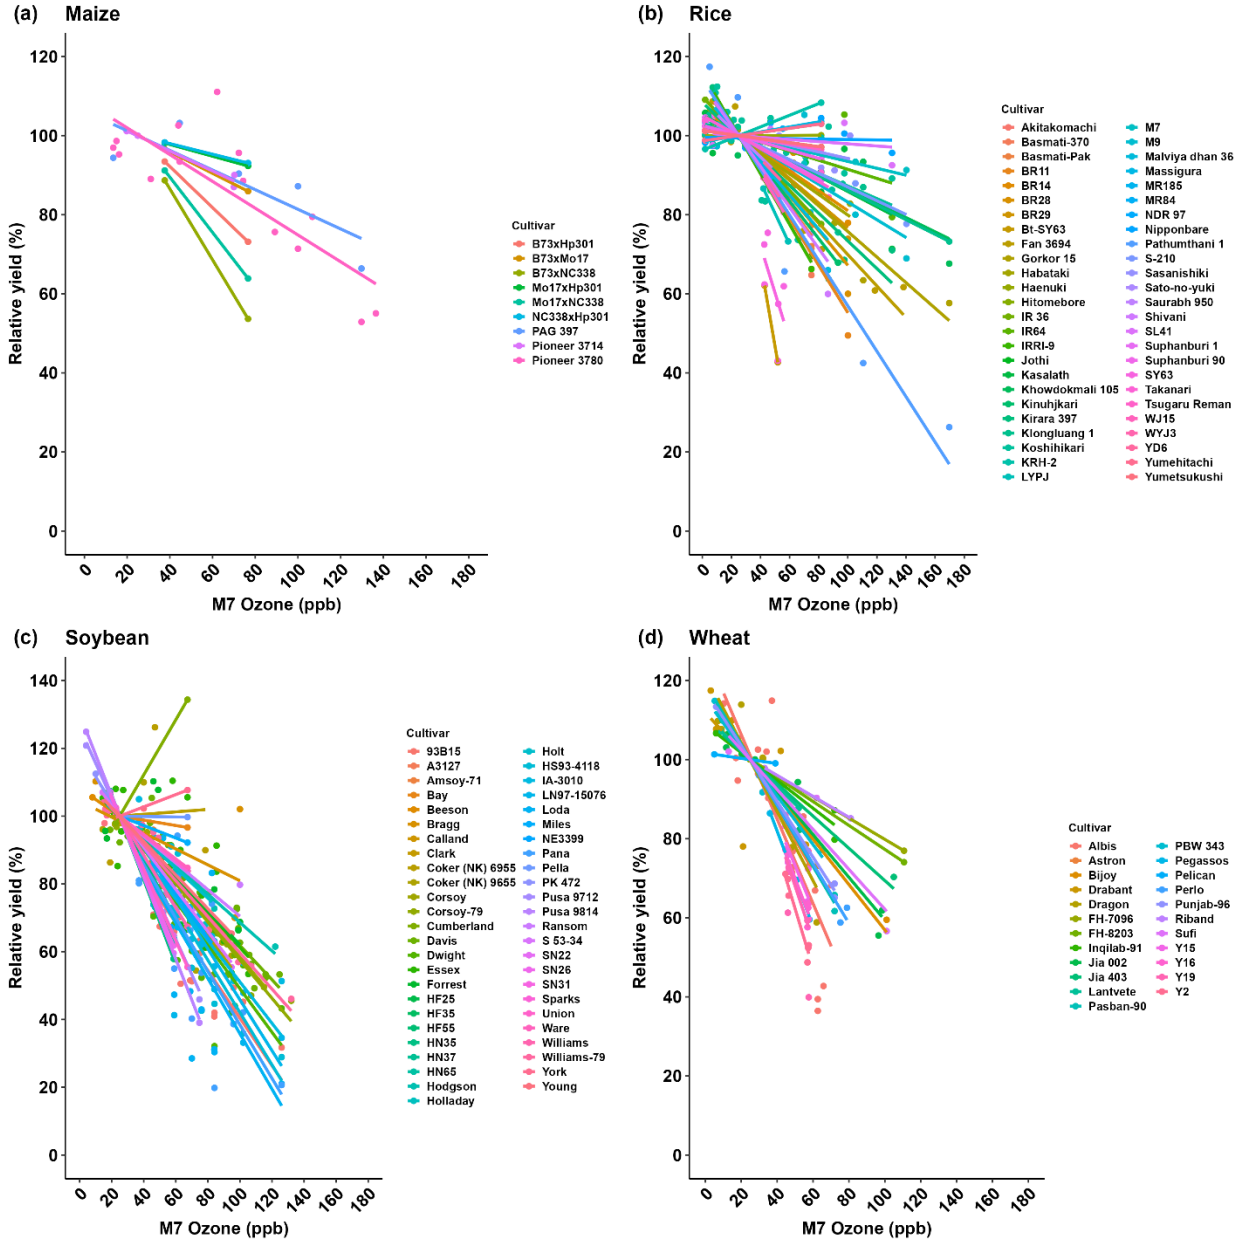

**Figure S2: The cultivar O<sub>3</sub> exposure-yield response for increasing M7 O<sub>3</sub> concentrations. The data consists of the relative yields (scaled to 25 ppb M7 O<sub>3</sub>) of the cultivars examined in the Mills et al. (2018) literature review combined with the maize and soybean cultivars used in this study for a total of (a) 9 maize cultivars, (b) 50 rice cultivars, (c) 49 soybean cultivars, and (d) 23 wheat cultivars (colored symbols). The colored lines show the linear regression of the exposure-yield response for each cultivar. The slope and y-intercept of the linear fit for each cultivar are shown in Table S10.**

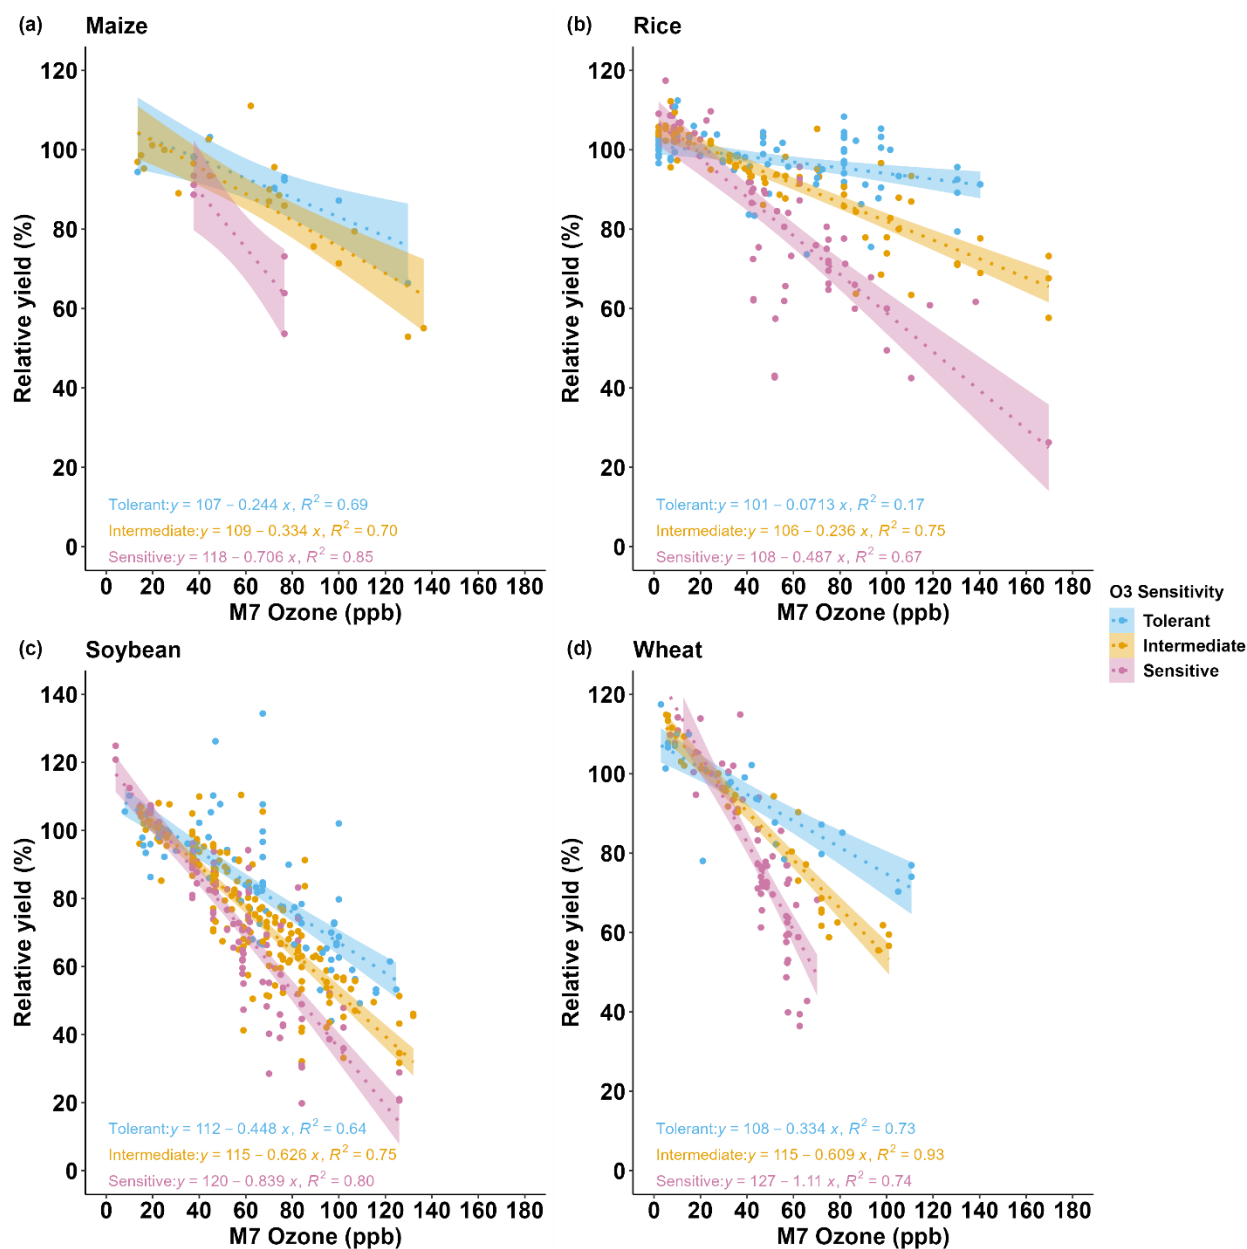

**Figure S3:** The O<sub>3</sub> exposure linear relationships (dotted lines) calculated from the literature data (symbols, Fig. S2) for (a) maize, (b) rice, (c) soybean, and (d) wheat. The data consists of the relative yields (scaled to 25 ppb M7 O<sub>3</sub>) of the cultivars examined in the Mills et al. (2018) literature review combined with the maize and soybean cultivars used in this study for a total of (a) 9 maize cultivars, (b) 50 rice cultivars, (c) 49 soybean cultivars, and (d) 23 wheat cultivars (Fig S2). The cultivars were classified into three O<sub>3</sub> sensitivities: tolerant (blue), intermediate (gold), and sensitive (magenta) by grouping the cultivar O<sub>3</sub> exposure response (Fig. S2 slope) into three evenly distributed quantiles: 66%-100%, 33%-66%, and 0%-33%, respectively. The O<sub>3</sub> sensitivities determined for each cultivar are listed in Table S10. For each crop, the O<sub>3</sub> exposure-yield response equations and the coefficient of determination ( $r^2$ ) of the linear fit for each cultivar O<sub>3</sub> sensitivity are labeled. The color shaded area shows the standard error of the linear fit for each of the cultivar O<sub>3</sub> sensitivities.

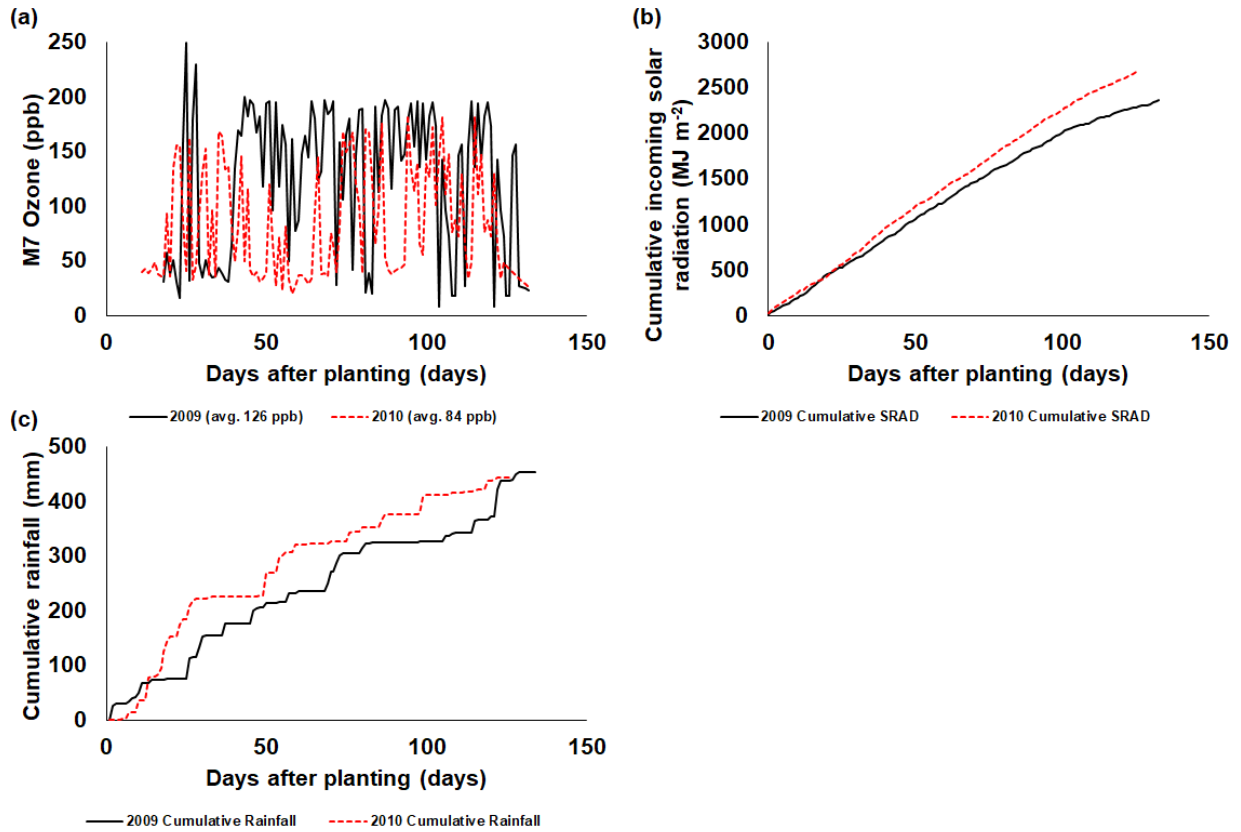

Figure S4. (a) Daily mean 7-hour O<sub>3</sub> concentrations of the highest O<sub>3</sub> treatment, (b) cumulative incoming solar radiation, and (c) cumulative rainfall for the 2009 (solid line) and 2010 (dashed line) growing seasons of the SoyFACE experiment conducted at Champaign, IL, USA.

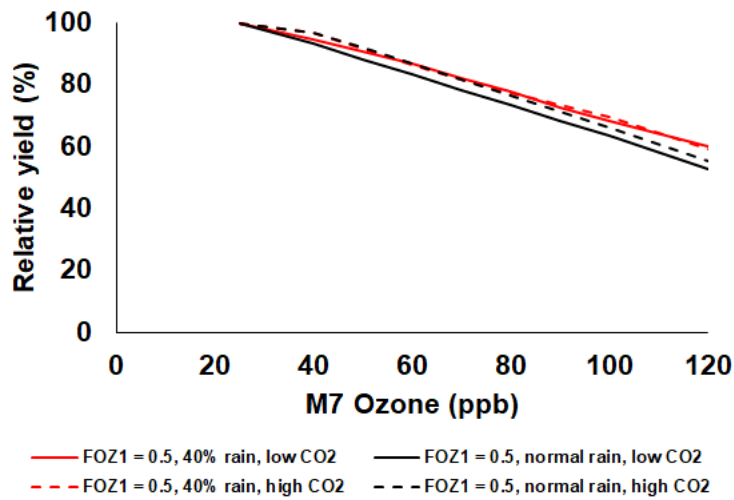

Figure S5: Sensitivity analysis using the CERES-Maize model to simulate relative yield due to elevated O<sub>3</sub> stress for an example of FOZ<sub>1</sub> set at 0.5 under the 40% reduced rainfall and 350 ppm CO<sub>2</sub> (solid red line), normal rainfall and 350 ppm CO<sub>2</sub> (solid black line), 40% less rainfall and 550 ppm CO<sub>2</sub> (dashed red line), and normal rainfall and 550 CO<sub>2</sub> (dashed black line) scenarios. The Champaign, Illinois, USA 2018 FACE weather, soil, and dominant management conditions were used for the reference location. FOZ<sub>1</sub> was tested independently, i.e., SFOZ<sub>1</sub> was set to zero. The 50% reduced rainfall shown in Fig. 4c had low simulated water deficit stress which obscured the O<sub>3</sub>-water stress dynamics. Reducing the rainfall to 40% increased simulated water deficit stress to allow for a better representation of the O<sub>3</sub>-water stress dynamics.

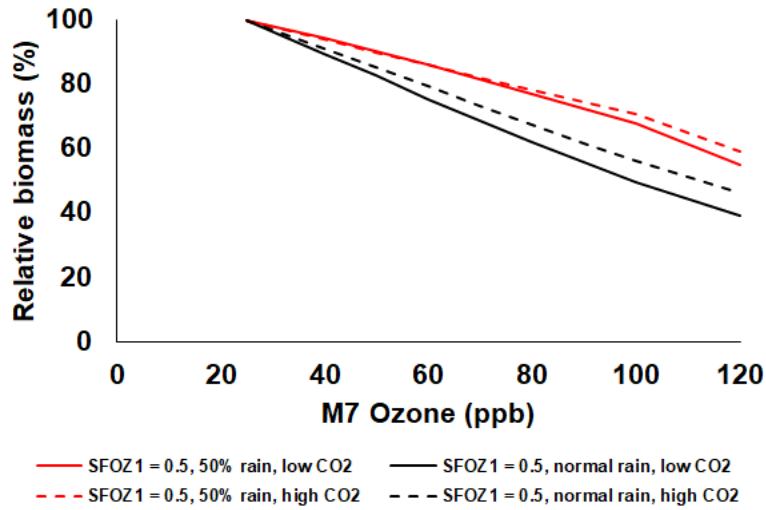

Figure S6: Sensitivity analysis using the CROPGRO-Soybean model to simulate relative biomass due to elevated O<sub>3</sub> stress with SFOZ<sub>1</sub> set at 0.5 under the 50% reduced rainfall and 350 ppm CO<sub>2</sub> (solid red line), normal rainfall and 350 ppm CO<sub>2</sub> (solid black line), 50% less rainfall and 550 ppm CO<sub>2</sub> (dashed red line), and normal rainfall and 550 CO<sub>2</sub> (dashed black line) scenarios. The Champaign, Illinois, USA 2009 SoyFACE weather, soil, and dominant management conditions were used for the reference location. FOZ<sub>1</sub> was set to zero.

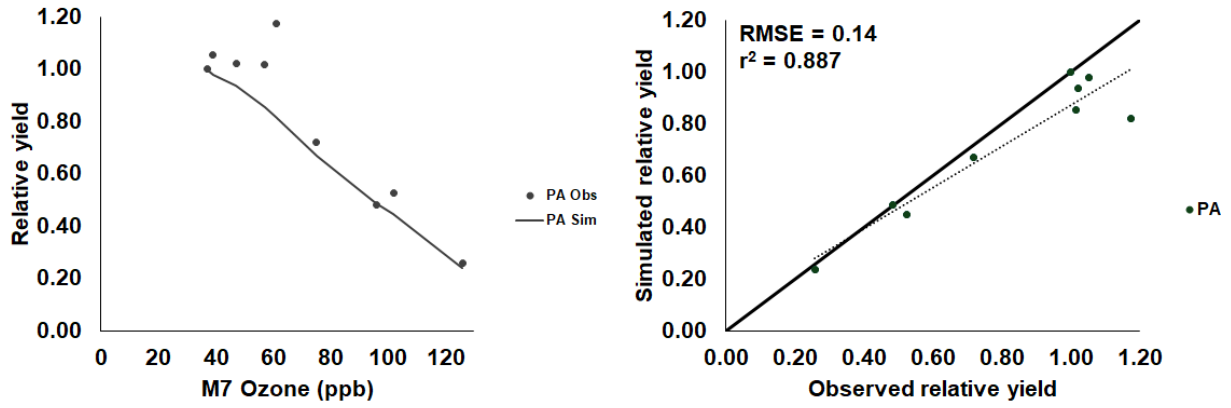

Figure S7: Observed relative yield under elevated M7 O<sub>3</sub> concentrations (left) and simulated model performance of the relative yield (right) of the soybean cultivar, cv. Pana (PA). The root-mean-square error (RMSE) and coefficient of determination ( $r^2$ ) show the model performance. Solid black line shows 1:1 comparison and dotted black line shows linear fit.

## References

- Adams, R. M., Glycer, J. D., Johnson, S. L., and McCarl, B. A.: A reassessment of the economic effects of ozone on United States agriculture, *Japca-the Journal of the Air & Waste Management Association*, 39, 960-968, 10.1080/08940630.1989.10466583, 1989.
- Adrees, M., Saleem, F., Jabeen, F., Rizwan, M., Ali, S., Khalid, S., Ibrahim, M., Iqbal, N., and Abbas, F.: Effects of ambient gaseous pollutants on photosynthesis, growth, yield and grain quality of selected crops grown at different sites varying in pollution levels, *Archives of Agronomy and Soil Science*, 62, 1195-1207, 10.1080/03650340.2015.1134782, 2016.
- Akhtar, N., Yamaguchi, M., Inada, H., Hoshino, D., Kondo, T., and Izuta, T.: Effects of ozone on growth, yield and leaf gas exchange rates of two Bangladeshi cultivars of wheat (*Triticum aestivum* L.), *Environmental Pollution*, 158, 1763-1767, 10.1016/j.envpol.2009.11.011, 2010a.
- Akhtar, N., Yamaguchi, M., Inada, H., Hoshino, D., Kondo, T., Fukami, M., Funada, R., and Izuta, T.: Effects of ozone on growth, yield and leaf gas exchange rates of four Bangladeshi cultivars of rice (*Oryza sativa* L.), *Environmental Pollution*, 158, 2970-2976, 10.1016/j.envpol.2010.05.026, 2010b.
- Ariyaphanphitak, W., Chidthaisong, A., Sarobol, E., Bashkin, V. N., and Towprayoon, S.: Effects of elevated ozone concentrations on Thai Jasmine rice cultivars (*Oryza sativa* L.), *Water Air and Soil Pollution*, 167, 179-200, 10.1007/s11270-005-8650-4, 2005.
- Betzelberger, A. M., Gillespie, K. M., McGrath, J. M., Koester, R. P., Nelson, R. L., and Ainsworth, E. A.: Effects of chronic elevated ozone concentration on antioxidant capacity, photosynthesis and seed yield of 10 soybean cultivars, *Plant Cell and Environment*, 33, 1569-1581, 10.1111/j.1365-3040.2010.02165.x, 2010.
- Betzelberger, A. M., Yendrek, C. R., Sun, J. D., Leisner, C. P., Nelson, R. L., Ort, D. R., and Ainsworth, E. A.: Ozone Exposure Response for U.S. Soybean Cultivars: Linear Reductions in Photosynthetic Potential, Biomass, and Yield, *Plant Physiology*, 160, 1827-1839, 10.1104/pp.112.205591, 2012.
- Booker, F. L., Prior, S. A., Torbert, H. A., Fiscus, E. L., Pursley, W. A., and Hu, S. J.: Decomposition of soybean grown under elevated concentrations of CO<sub>2</sub> and O<sub>3</sub>, *Global Change Biology*, 11, 685-698, 10.1111/j.1365-2486.2005.00939.x, 2005.
- Burkart, S., Bender, J., Tarkotta, B., Faust, S., Castagna, A., Ranieri, A., and Weigel, H. J.: Effects of Ozone on Leaf Senescence, Photochemical Efficiency and Grain Yield in Two Winter Wheat Cultivars, *Journal of Agronomy and Crop Science*, 199, 275-285, 10.1111/jac.12013, 2013.
- Chernikova, T., Robinson, J. M., Lee, E. H., and Mulchi, C. L.: Ozone tolerance and antioxidant enzyme activity in soybean cultivars, *Photosynthesis Research*, 64, 15-26, 10.1023/a:1026500911237, 2000.
- Choquette, N. E., Ainsworth, E. A., Bezodis, W., and Cavanagh, A. P.: Ozone tolerant maize hybrids maintain Rubisco content and activity during long-term exposure in the field, *Plant Cell and Environment*, 43, 3033-3047, 10.1111/pce.13876, 2020.
- De Temmerman, L., Vandermeiren, K., and Guns, M.: Effects of air filtration on spring wheat grown in open-top field chambers at a rural site 1. effects on growth, yield and dry-matter partitioning, *Environmental Pollution*, 77, 1-5, 10.1016/0269-7491(92)90151-y, 1992.
- Feng, Z. Z., Yao, F. F., Chen, Z., Wang, X. K., Meng, Q. W., and Feng, Z. W.: Response of gas exchange and yield components of field-grown *Triticum aestivum* L. to elevated ozone in China, *Photosynthetica*, 45, 441-446, 10.1007/s11099-007-0073-6, 2007.
- Fiscus, E. L., Reid, C. D., Miller, J. E., and Heagle, A. S.: Elevated CO<sub>2</sub> reduces O<sub>3</sub> flux and O<sub>3</sub>-induced yield losses in soybeans: Possible implications for elevated CO<sub>2</sub> studies, *Journal of Experimental Botany*, 48, 307-313, 10.1093/jxb/48.2.307, 1997.
- Frei, M., Kohno, Y., Tietze, S., Jekle, M., Hussein, M. A., Becker, T., and Becker, K.: The response of rice grain quality to ozone exposure during growth depends on ozone level and genotype, *Environmental Pollution*, 163, 199-206, 10.1016/j.envpol.2011.12.039, 2012.
- Fuhrer, J., Grimm, A. G., Tschannen, W., and Shariatmadari, H.: The response of spring wheat (*Triticum aestivum* L.) to ozone at higher elevations 2. Changes in yield, yield components and grain quality in response to ozone flux, *New Phytologist*, 121, 211-219, 10.1111/j.1469-8137.1992.tb01106.x, 1992.
- Fuhrer, J., Egger, A., Lehnher, B., Grandjean, A., and Tschannen, W.: Effects of ozone on the yield of spring wheat (*Triticum aestivum* L. cv Albis) grown in open-top field chambers, *Environmental Pollution*, 60, 273-289, 10.1016/0269-7491(89)90109-7, 1989.
- Gelang, J., Pleijel, H., Sild, E., Danielsson, H., Younis, S., and Sellden, G.: Rate and duration of grain filling in relation to flag leaf senescence and grain yield in spring wheat (*Triticum aestivum*) exposed to different concentrations of ozone, *Physiologia Plantarum*, 110, 366-375, 10.1034/j.1399-3054.2000.1100311.x, 2000.

Heagle, A. S. and Letchworth, M. B.: Relationships among injury, growth, and yield responses of soybean cultivars exposed to ozone at different light intensities, *Journal of Environmental Quality*, 11, 690-694, 10.2134/jeq1982.00472425001100040027x, 1982.

Heagle, A. S., Letchworth, M. B., and Mitchell, C. A.: Effects of growth-medium and fertilizer rate on the yield response of soybeans exposed to chronic doses of ozone, *Phytopathology*, 73, 134-139, 10.1094/Phyto-73-134, 1983a.

Heagle, A. S., Miller, J. E., and Pursley, W. A.: Influence of ozone stress on soybean response to carbon dioxide enrichment: III. Yield and seed quality, *Crop Science*, 38, 128-134, 10.2135/cropsci1998.0011183X003800010022x, 1998.

Heagle, A. S., Heck, W. W., Rawlings, J. O., and Philbeck, R. B.: Effects of chronic doses of ozone and sulfur-dioxide on injury and yield of soybeans in open-top field chambers, *Crop Science*, 23, 1184-1191, 10.2135/cropsci1983.0011183X002300060037x, 1983b.

Heagle, A. S., Miller, J. E., Rawlings, J. O., and Vozzo, S. F.: Effect of growth stage on soybean response to chronic ozone exposure, *Journal of Environmental Quality*, 20, 562-570, 10.2134/jeq1991.00472425002000030010x, 1991.

Heagle, A. S., Lesser, V. M., Rawlings, J. O., Heck, W. W., and Philbeck, R. B.: Response of soybeans to chronic doses of ozone applied as constant or proportional additions to ambient air, *Phytopathology*, 76, 51-56, 10.1094/Phyto-76-51, 1986.

Heagle, A. S., Flagler, R. B., Patterson, R. P., Lesser, V. M., Shafer, S. R., and Heck, W. W.: Injury and yield response of soybean to chronic doses of ozone and soil-moisture deficit, *Crop Science*, 27, 1016-1024, 10.2135/cropsci1987.0011183X002700050039x, 1987.

Heggestad, H. E. and Lesser, V. M.: Effects of ozone, sulfur-dioxide, soil-water, and cultivar on yields of soybean, *Journal of Environmental Quality*, 19, 488-495, 10.2134/jeq1990.00472425001900030022x, 1990.

Heggestad, H. E., Anderson, E. L., Gish, T. J., and Lee, E. H.: Effects of ozone and soil-water deficit on roots and shoots of field-grown soybeans, *Environmental Pollution*, 50, 259-278, 10.1016/0269-7491(88)90191-1, 1988.

Heggestad, H. E., Gish, T. J., Lee, E. H., Bennett, J. H., and Douglass, L. W.: Interaction of soil-moisture stress and ambient ozone on growth and yields of soybeans, *Phytopathology*, 75, 472-477, 10.1094/Phyto-75-472, 1985.

Ishii, S., Marshall, F. M., Bell, J. N. B., and Abdullah, A. M.: Impact of ambient air pollution on locally grown rice cultivars (*Oryza sativa* L.) in Malaysia, *Water Air and Soil Pollution*, 154, 187-201, 10.1023/b:wate.0000022964.55434.05, 2004.

Kats, G., Dawson, P. J., Bytnerowicz, A., Wolf, J. W., Thompson, C. R., and Olszyk, D. M.: Effects of ozone or sulfur-dioxide on growth and yield of rice, *Agriculture Ecosystems & Environment*, 14, 103-117, 10.1016/0167-8809(85)90088-x, 1985.

Khan, S. and Soja, G.: Yield responses of wheat to ozone exposure as modified by drought-induced differences in ozone uptake, *Water Air and Soil Pollution*, 147, 299-315, 10.1023/a:1024577429129, 2003.

Kobayashi, K., Okada, M., and Nouchi, I.: Effects of ozone on dry-matter partitioning and yield of Japanese cultivars of rice (*Oryza sativa* L.), *Agriculture Ecosystems & Environment*, 53, 109-122, 10.1016/0167-8809(94)00564-u, 1995.

Kohut, R. J., Amundson, R. G., and Laurence, J. A.: Evaluation of growth and yield of soybean exposed to ozone in the field, *Environmental Pollution Series a-Ecological and Biological*, 41, 219-234, 10.1016/0143-1471(86)90071-1, 1986.

Kress, L. W. and Miller, J. E.: Impact of ozone on soybean yield, *Journal of Environmental Quality*, 12, 276-281, 10.2134/jeq1983.00472425001200020025x, 1983.

Kress, L. W. and Miller, J. E.: Impact of ozone on field-corn yield, *Canadian Journal of Botany-Revue Canadienne De Botanique*, 63, 2408-2415, 10.1139/b85-344, 1985.

Kress, L. W., Miller, J. E., Smith, H. J., and Rawlings, J. O.: Impact of ozone and sulfur-dioxide on soybean yield, *Environmental Pollution Series a-Ecological and Biological*, 41, 105-123, 10.1016/0143-1471(86)90087-5, 1986.

Lesser, V. M., Rawlings, J. O., Spruill, S. E., and Somerville, M. C.: Ozone effects on agricultural crops: Statistical methodologies and estimated dose-response relationships, *Crop Science*, 30, 148-155, 10.2135/cropsci1990.0011183X003000010033x, 1990.

Li, C. H., Zhu, J. G., Zeng, Q., Luo, K. J., Liu, B., Liu, G., and Tang, H. Y.: Different responses of transgenic Bt rice and conventional rice to elevated ozone concentration, *Environmental Science and Pollution Research*, 24, 8352-8362, 10.1007/s11356-017-8508-5, 2017.

McKee, D. J.: *Tropospheric ozone: Human health and agricultural impacts*, 1993.

Miller, J. E., Heagle, A. S., Vozzo, S. F., Philbeck, R. B., and Heck, W. W.: Effects of ozone and water-stress, separately and in combination, on soybean yield, *Journal of Environmental Quality*, 18, 330-336, 10.2134/jeq1989.00472425001800030016x, 1989.



Miller, J. E., Booker, F. L., Fiscus, E. L., Heagle, A. S., Pursley, W. A., Vozzo, S. F., and Heck, W. W.: Ultraviolet-B radiation and ozone effects on growth, yield, and photosynthesis of soybean, *Journal of Environmental Quality*, 23, 83-91, 10.2134/jeq1994.00472425002300010012x, 1994.

Mills, G., Sharps, K., Simpson, D., Pleijel, H., Frei, M., Burkey, K., Emberson, L., Uddling, J., Broberg, M., Feng, Z. Z., Kobayashi, K., and Agrawal, M.: Closing the global ozone yield gap: Quantification and cobenefits for multistress tolerance, *Global Change Biology*, 24, 4869-4893, 10.1111/gcb.14381, 2018.

Morgan, P. B., Mies, T. A., Bollero, G. A., Nelson, R. L., and Long, S. P.: Season-long elevation of ozone concentration to projected 2050 levels under fully open-air conditions substantially decreases the growth and production of soybean, *New Phytologist*, 170, 333-343, 10.1111/j.1469-8137.2006.01679.x, 2006.

Mulchi, C., Rudorff, B., Lee, E., Rowland, R., and Pausch, R.: Morphological responses among crop species to full-season exposures to enhanced concentrations of atmospheric CO<sub>2</sub> and O<sub>3</sub>, *Water Air and Soil Pollution*, 85, 1379-1386, 10.1007/bf00477174, 1995.

Mulchi, C. L., Lee, E., Tuthill, K., and Olinick, E. V.: Influence of ozone stress on growth-processes, yields and grain quality characteristics among soybean cultivars, *Environmental Pollution*, 53, 151-169, 10.1016/0269-7491(88)90031-0, 1988.

NRCS, S. S. S.: Natural Resources Conservation Service, United States Department of Agriculture. Web Soil Survey, 2023.

Ollerenshaw, J. H. and Lyons, T.: Impacts of ozone on the growth and yield of field-grown winter wheat, *Environmental Pollution*, 106, 67-72, 10.1016/s0269-7491(99)00060-3, 1999.

Olszyk, D. M., Cabrera, H., and Thompson, C. R.: California statewide assessment of the effects of ozone on crop productivity, *Japca-the International Journal of Air Pollution Control and Hazardous Waste Management*, 38, 928-931, 10.1080/08940630.1988.10466435, 1988.

Osborne, S. A., Mills, G., Hayes, F., Ainsworth, E. A., Buker, P., and Emberson, L.: Has the sensitivity of soybean cultivars to ozone pollution increased with time? An analysis of published dose-response data, *Global Change Biology*, 22, 3097-3111, 10.1111/gcb.13318, 2016.

Pang, J., Kobayashi, K., and Zhu, J. G.: Yield and photosynthetic characteristics of flag leaves in Chinese rice (*Oryza sativa* L.) varieties subjected to free-air release of ozone, *Agriculture Ecosystems & Environment*, 132, 203-211, 10.1016/j.agee.2009.03.012, 2009.

Pleijel, H., Skarby, L., Wallin, G., and Sellden, G.: Yield and grain quality of spring wheat (*Triticum aestivum* L., cv. Drabant) exposed to different concentrations of ozone in open-top chambers, *Environmental Pollution*, 69, 151-168, 10.1016/0269-7491(91)90140-r, 1991.

Pleijel, H., Eriksen, A. B., Danielsson, H., Bondesson, N., and Sellden, G.: Differential ozone sensitivity in an old and a modern Swedish wheat cultivar - grain yield and quality, leaf chlorophyll and stomatal conductance, *Environmental and Experimental Botany*, 56, 63-71, 10.1016/j.envexpbot.2005.01.004, 2006.

Rai, R. and Agrawal, M.: Evaluation of physiological and biochemical responses of two rice (*Oryza sativa* L.) cultivars to ambient air pollution using open top chambers at a rural site in India, *Science of the Total Environment*, 407, 679-691, 10.1016/j.scitotenv.2008.09.010, 2008.

Robinson, J. M. and Britz, S. J.: Tolerance of a field grown soybean cultivar to elevated ozone level is concurrent with higher leaflet ascorbic acid level, higher ascorbate-dehydroascorbate redox status, and long term photosynthetic productivity, *Photosynthesis Research*, 64, 77-87, 10.1023/a:1026508227189, 2000.

Rudorff, B. F. T., Mulchi, C. L., Lee, E. H., Rowland, R., and Pausch, R.: Effects of enhanced O<sub>3</sub> and CO<sub>2</sub> enrichment on plant characteristics in wheat and corn, *Environmental Pollution*, 94, 53-60, 10.1016/s0269-7491(96)00050-4, 1996.

Sarkar, A., Singh, A. A., Agrawal, S. B., Ahmad, A., and Rai, S. P.: Cultivar specific variations in antioxidative defense system, genome and proteome of two tropical rice cultivars against ambient and elevated ozone, *Ecotoxicology and Environmental Safety*, 115, 101-111, 10.1016/j.ecoenv.2015.02.010, 2015.

Sawada, H. and Kohno, Y.: Differential ozone sensitivity of rice cultivars as indicated by visible injury and grain yield, *Plant Biology*, 11, 70-75, 10.1111/j.1438-8677.2009.00233.x, 2009.

Sawada, H., Komatsu, S., Nanjo, Y., Khan, N. A., and Kohno, Y.: Proteomic analysis of rice response involved in reduction of grain yield under elevated ozone stress, *Environmental and Experimental Botany*, 77, 108-116, 10.1016/j.envexpbot.2011.11.009, 2012.

Sawada, H., Tsukahara, K., Kohno, Y., Suzuki, K., Nagasawa, N., and Tamaoki, M.: Elevated Ozone Deteriorates Grain Quality of Japonica Rice cv. Koshihikari, Even if it Does Not Cause Yield Reduction, *Rice*, 9, 10, 10.1186/s12284-016-0079-4, 2016.

Shi, G. Y., Yang, L. X., Wang, Y. X., Kobayashi, K., Zhu, J. G., Tang, H. Y., Pan, S. T., Chen, T., Liu, G., and Wang, Y. L.: Impact of elevated ozone concentration on yield of four Chinese rice cultivars under fully open-air field conditions, *Agriculture Ecosystems & Environment*, 131, 178-184, 10.1016/j.agee.2009.01.009, 2009.

Singh, E., Tiwari, S., and Agrawal, M.: Variability in antioxidant and metabolite levels, growth and yield of two soybean varieties: An assessment of anticipated yield losses under projected elevation of ozone, *Agriculture Ecosystems & Environment*, 135, 168-177, 10.1016/j.agee.2009.09.004, 2010.

Singh, S. and Agrawal, S. B.: Cultivar-Specific Response of Soybean (*Glycine max* L.) to Ambient and Elevated Concentrations of Ozone Under Open Top Chambers, *Water Air and Soil Pollution*, 217, 283-302, 10.1007/s11270-010-0586-7, 2011.

Tomer, R., Bhatia, A., Kumar, V., Kumar, A., Singh, R., Singh, B., and Singh, S. D.: Impact of Elevated Ozone on Growth, Yield and Nutritional Quality of Two Wheat Species in Northern India, *Aerosol and Air Quality Research*, 15, 329-340, 10.4209/aaqr.2013.12.0354, 2015.

Troiano, J., Colavito, L., Heller, L., McCune, D. C., and Jacobson, J. S.: Effects of acidity of simulated rain and its joint action with ambient ozone on measures of biomass and yield in soybean, *Environmental and Experimental Botany*, 23, 113-119, 10.1016/0098-8472(83)90028-x, 1983.

Tsukahara, K., Sawada, H., Kohno, Y., Matsuura, T., Mori, I. C., Terao, T., Ioki, M., and Tamaoki, M.: Ozone-Induced Rice Grain Yield Loss Is Triggered via a Change in Panicle Morphology That Is Controlled by ABERRANT PANICLE ORGANIZATION 1 Gene, *Plos One*, 10, 14, 10.1371/journal.pone.0123308, 2015.

Wahid, A.: Influence of atmospheric pollutants on agriculture in developing countries: A case study with three new wheat varieties in Pakistan, *Science of the Total Environment*, 371, 304-313, 10.1016/j.scitotenv.2006.06.017, 2006.

Wahid, A., Ahmad, S. S., Butt, Z. A., and Ahmad, M.: Exploring the hidden threat of gaseous pollutants using rice (*Oryza sativa* L.) plants in Pakistan, *Pakistan Journal of Botany*, 43, 365-382, 2011.

Yamaguchi, M., Hoshino, D., Inada, H., Akhtar, N., Sumioka, C., Takeda, K., and Izuta, T.: Evaluation of the effects of ozone on yield of Japanese rice (*Oryza sativa* L.) based on stomatal ozone uptake, *Environmental Pollution*, 184, 472-480, 10.1016/j.envpol.2013.09.024, 2014.

Yamaguchi, M., Inada, H., Satoh, R., Hoshino, D., Nagasawa, A., Negishi, Y., Sasaki, H., Nouchi, I., Kobayashi, K., and Izuta, T.: Effects of ozone on the growth, yield and leaf gas exchange rates of two Japanese cultivars of rice (*Oryza sativa* L.), *Journal of Agricultural Meteorology*, 64, 131-141, 10.2480/agrmet.64.3.8, 2008.

Zhang, W. W., Wang, G. G., Liu, X. B., and Feng, Z. Z.: Effects of elevated O<sub>3</sub> exposure on seed yield, N concentration and photosynthesis of nine soybean cultivars (*Glycine max* (L.) Merr.) in Northeast China, *Plant Science*, 226, 172-181, 10.1016/j.plantsci.2014.04.020, 2014.

Zheng, F. X., Wang, X. K., Zhang, W. W., Hou, P. Q., Lu, F., Du, K. M., and Sun, Z. F.: Effects of elevated O<sub>3</sub> exposure on nutrient elements and quality of winter wheat and rice grain in Yangtze River Delta, China, *Environmental Pollution*, 179, 19-26, 10.1016/j.envpol.2013.03.051, 2013.

Zhu, X. K., Feng, Z. Z., Sun, T. F., Liu, X. C., Tang, H. Y., Zhu, J. G., Guo, W. S., and Kobayashi, K.: Effects of elevated ozone concentration on yield of four Chinese cultivars of winter wheat under fully open-air field conditions, *Global Change Biology*, 17, 2697-2706, 10.1111/j.1365-2486.2011.02400.x, 2011.
